# Supplementary material for: Locally varying formation of nanoclusters across a low-intensity ultra-short laser spot
Source: Royal Society of Chemistry journal article supplement (doi:10.1039/d2nh00386d), 2022-10-28
Supplement: d2nh00386d1.pdf [file d2nh00386d1.pdf]

## Supplementary information:

### Variations of metallic nanostructures formed by low-intensity ultra-short laser light across a laser spot

Niklas Osterloh, Tianluo Pan<sup>+</sup>, Karina Morgenstern<sup>1</sup>

<sup>1</sup>*Ruhr-Universität Bochum, Lehrstuhl für physikalische Chemie I,*

*Universitätsstr. 150, D-44801 Bochum, Germany,*

<sup>+</sup>*current address: Shenzhen Institute for Quantum*

*Science and Engineering and Department of Physics,*

*Southern University of Science and Technology, Shenzhen 518055, China*

(Dated: July 26, 2022)

#### Abstract

This Supplementary Information presents high-resolution STM images across the laser spot for the case discussed in detail in the main manuscript.

## STM IMAGES ACROSS THE LASER SPOT

Figs. 1 to 54 display the images across the laser spot labeled by their coordinates.

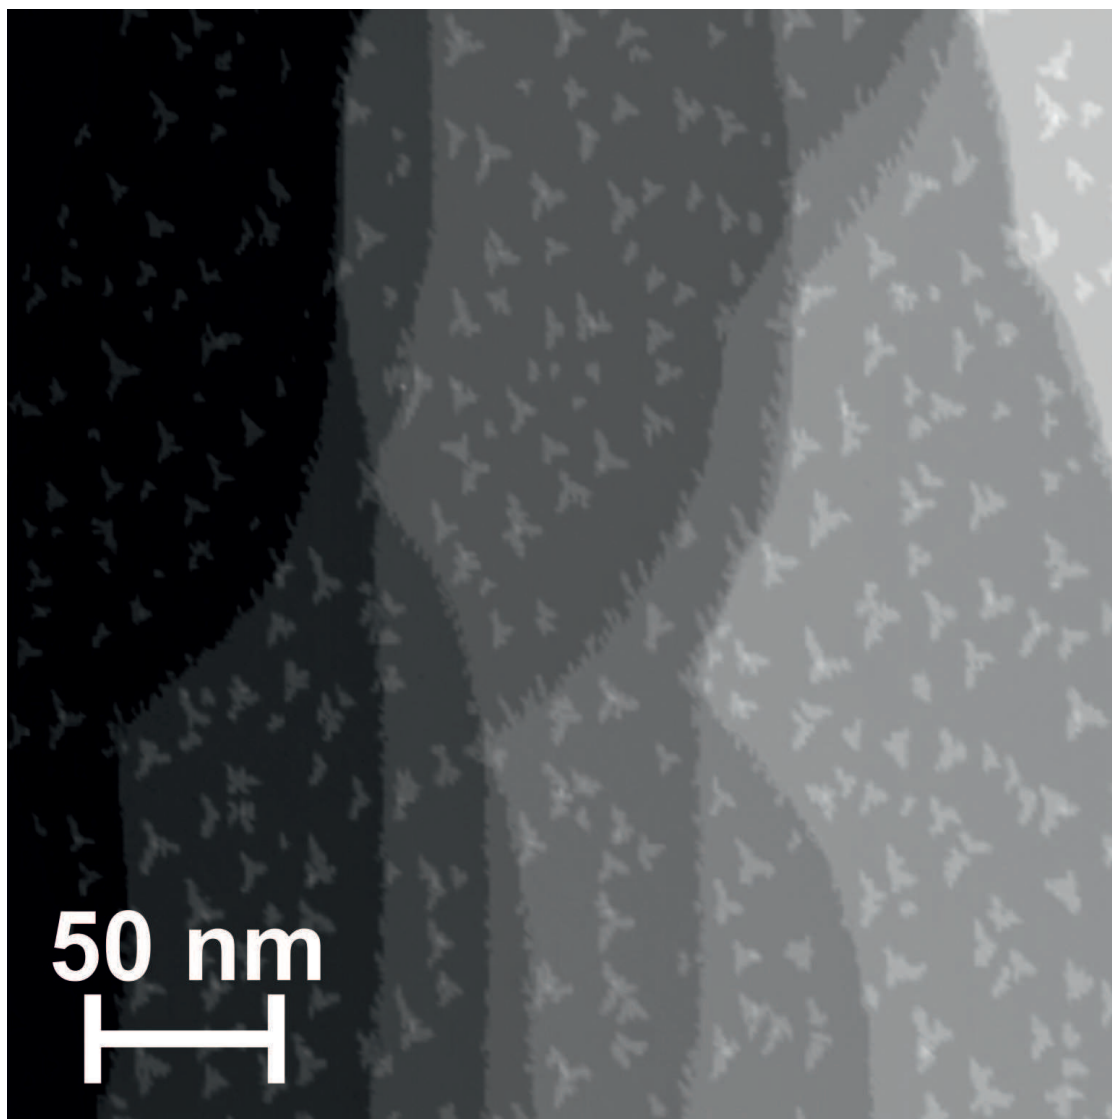

FIG. 1. Coordinates:  $x = 0$ ;  $y = 0$

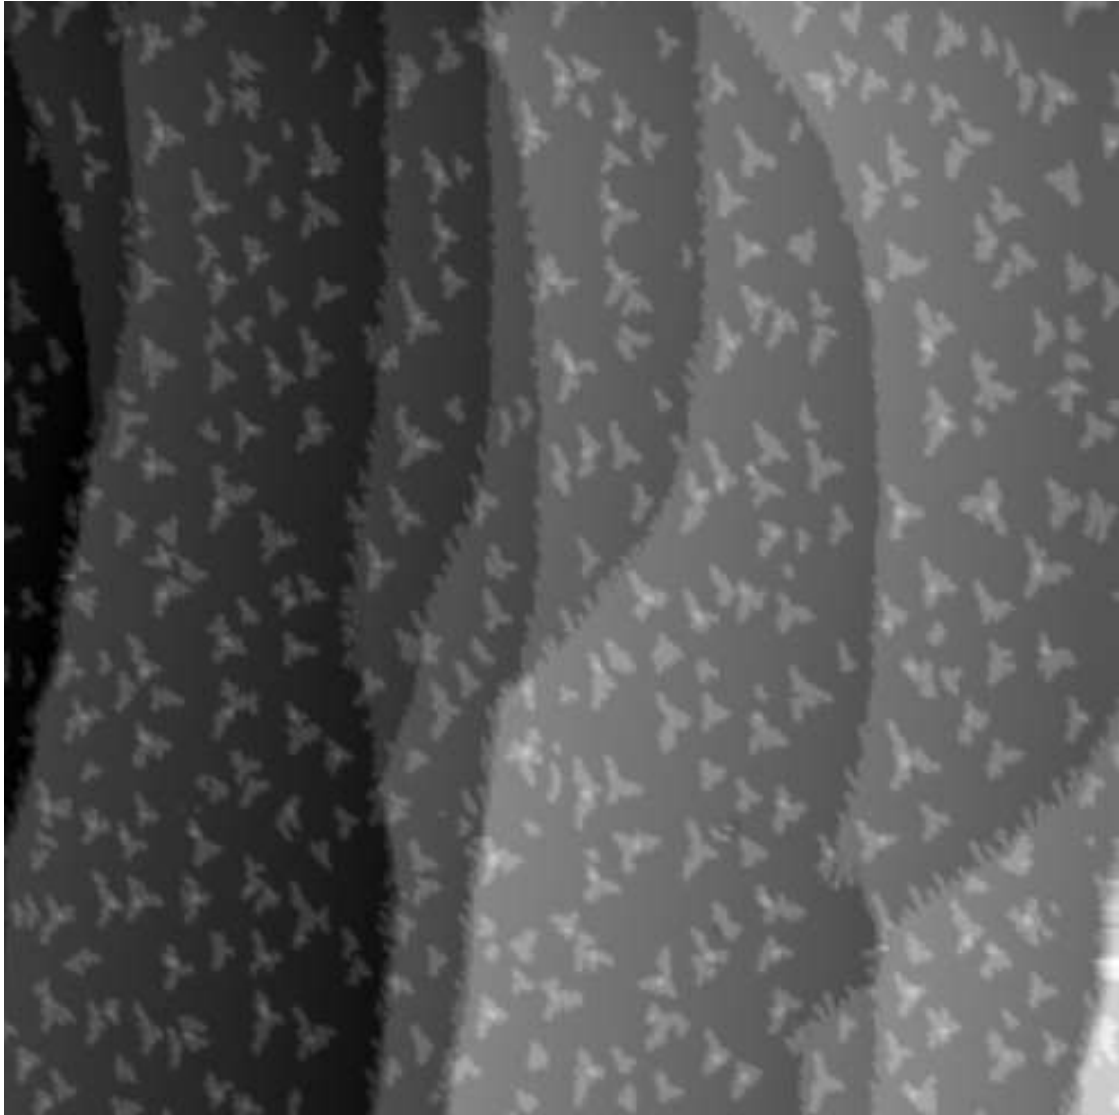

FIG. 2. Coordinates:  $x = 0,2$ ;  $y = 0$

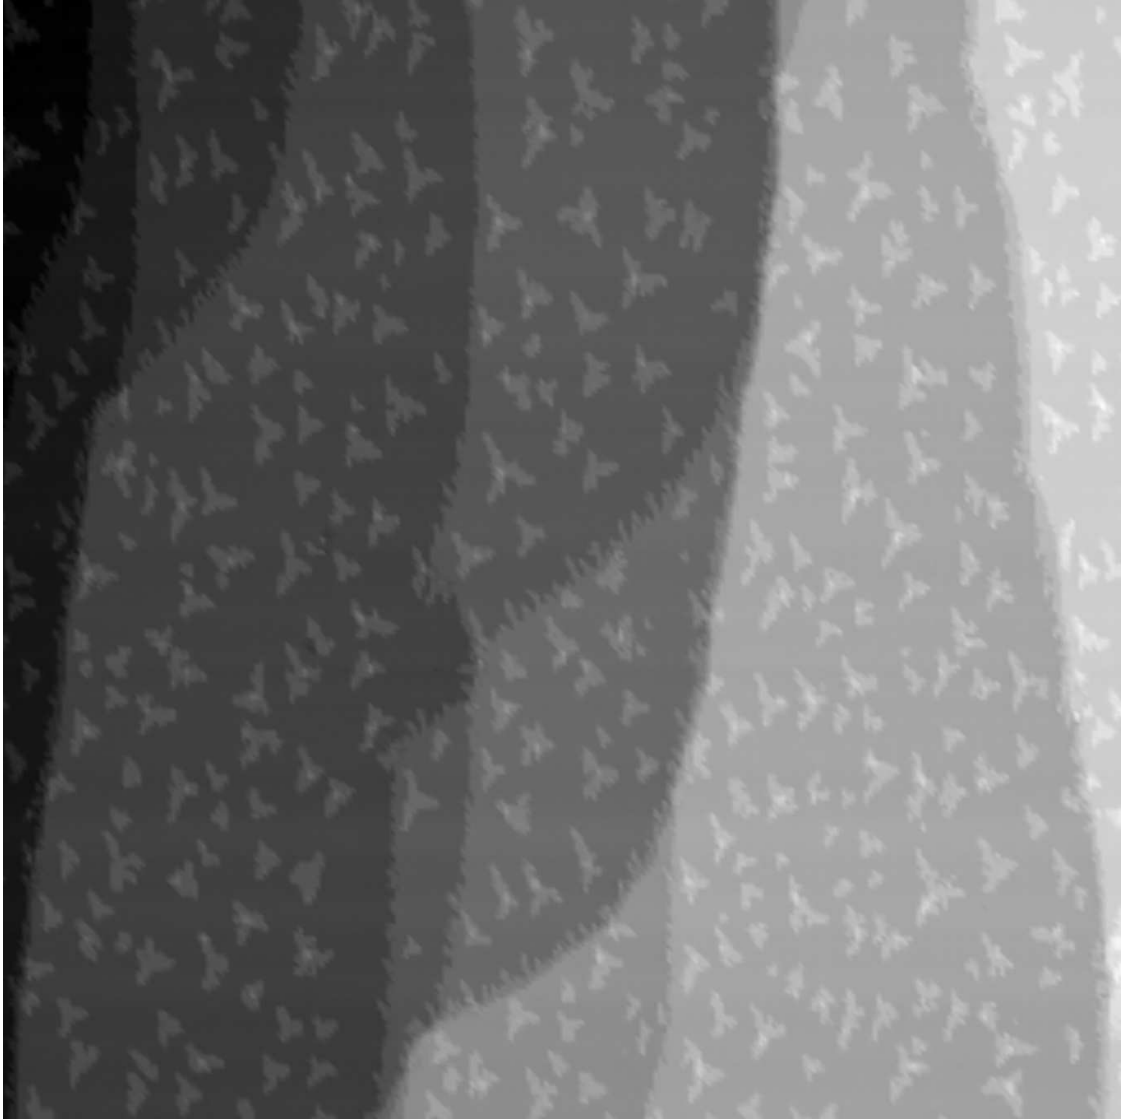

FIG. 3. Coordinates:  $x = 0,3$ ;  $y = 0,1$

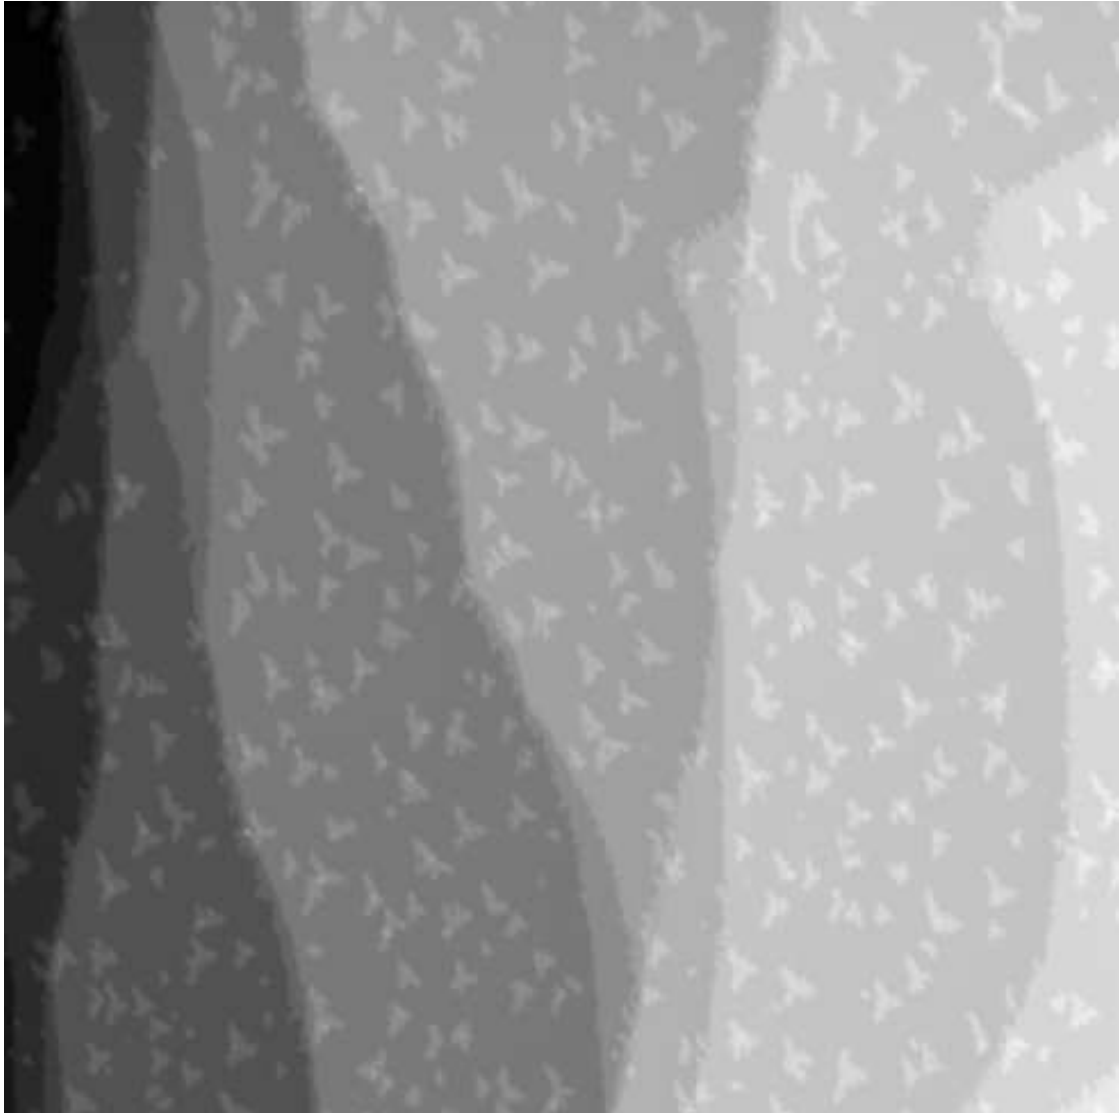

FIG. 4. Coordinates:  $x = 0,3$ ;  $y = 0,9$

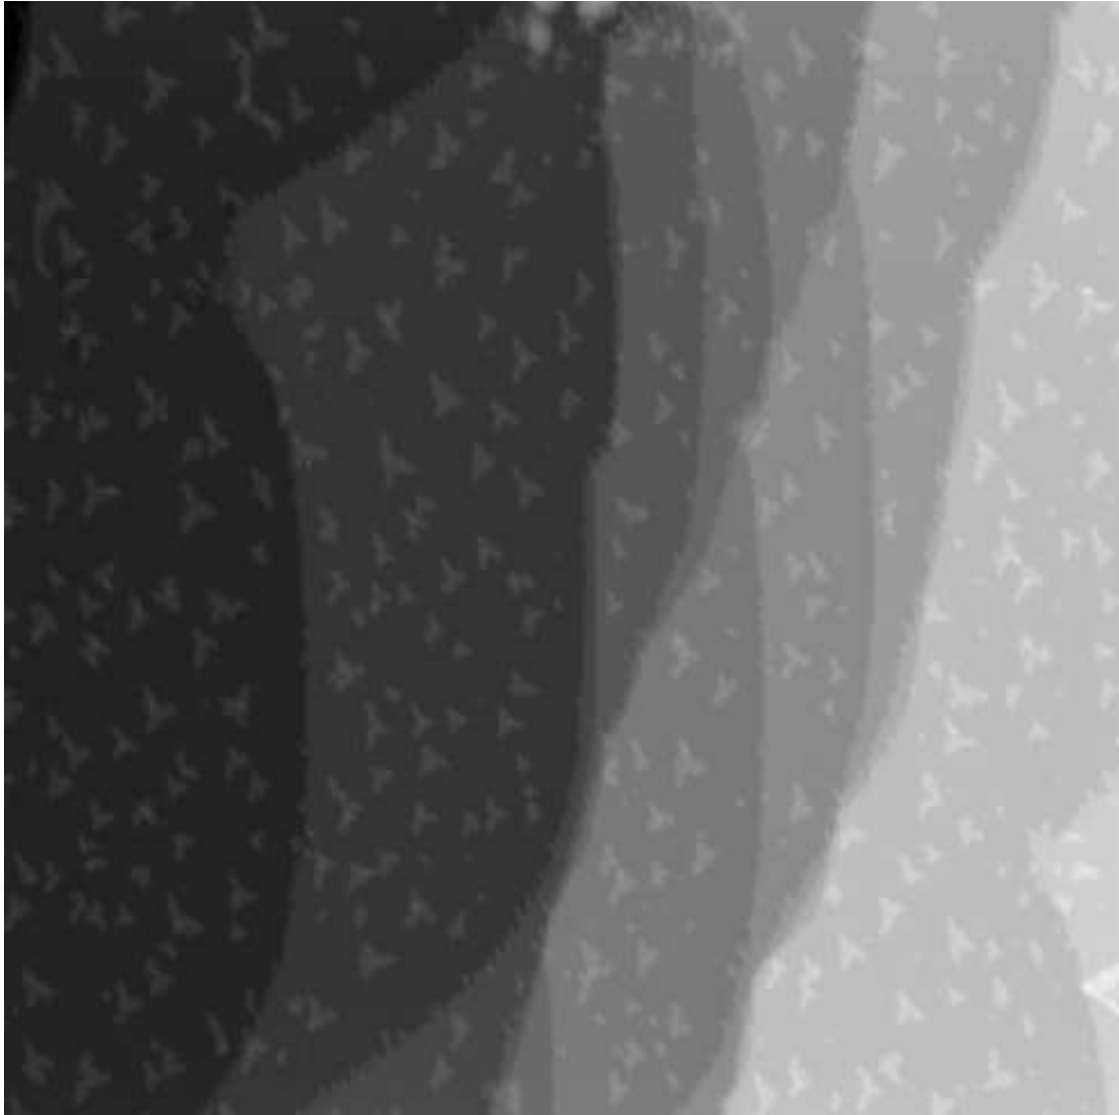

FIG. 5. Coordinates:  $x = 0,3$ ;  $y = 1,1$

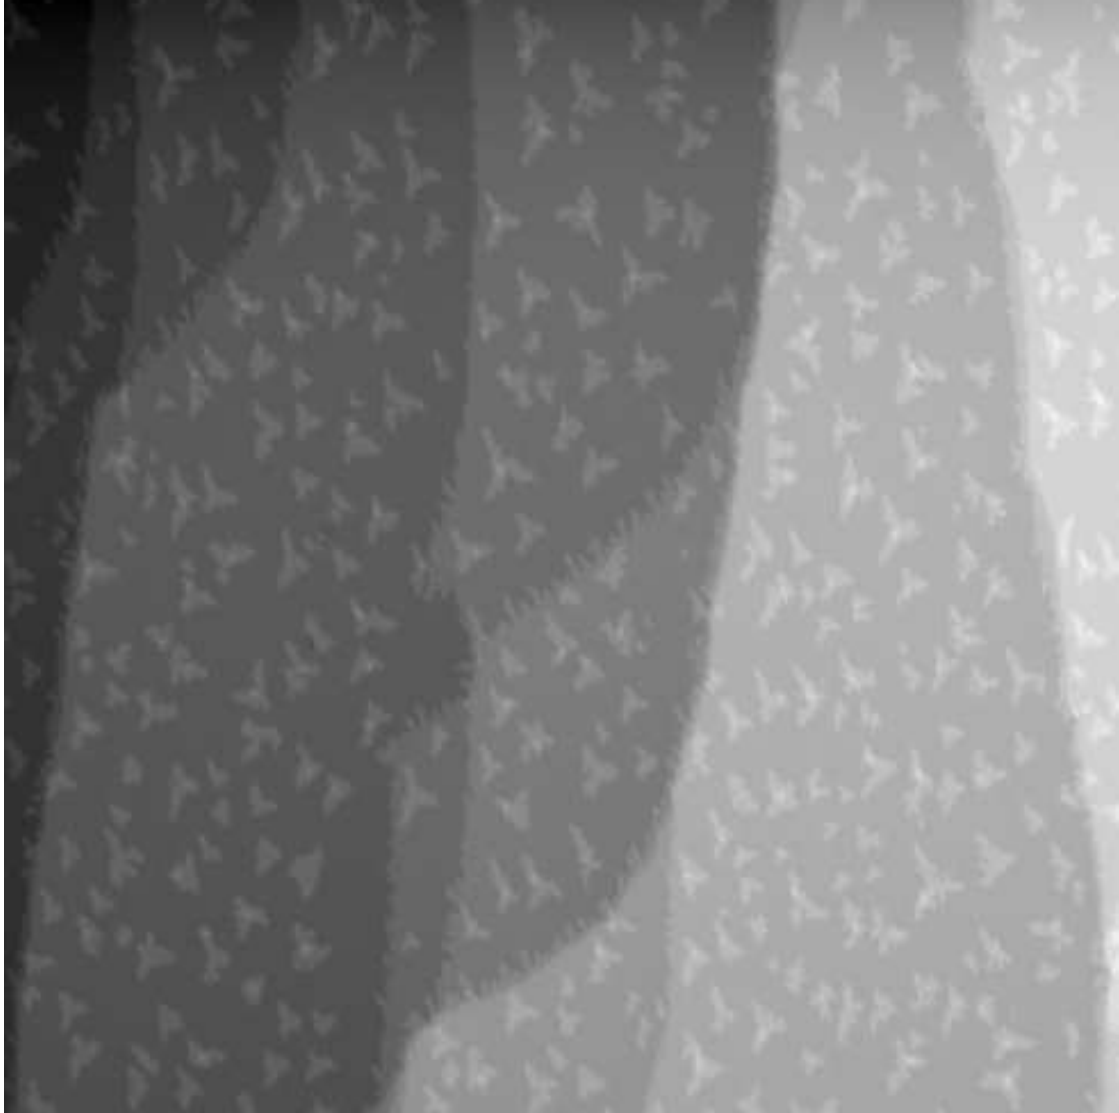

FIG. 6. Coordinates:  $x = 0,4$ ;  $y = 0,5$

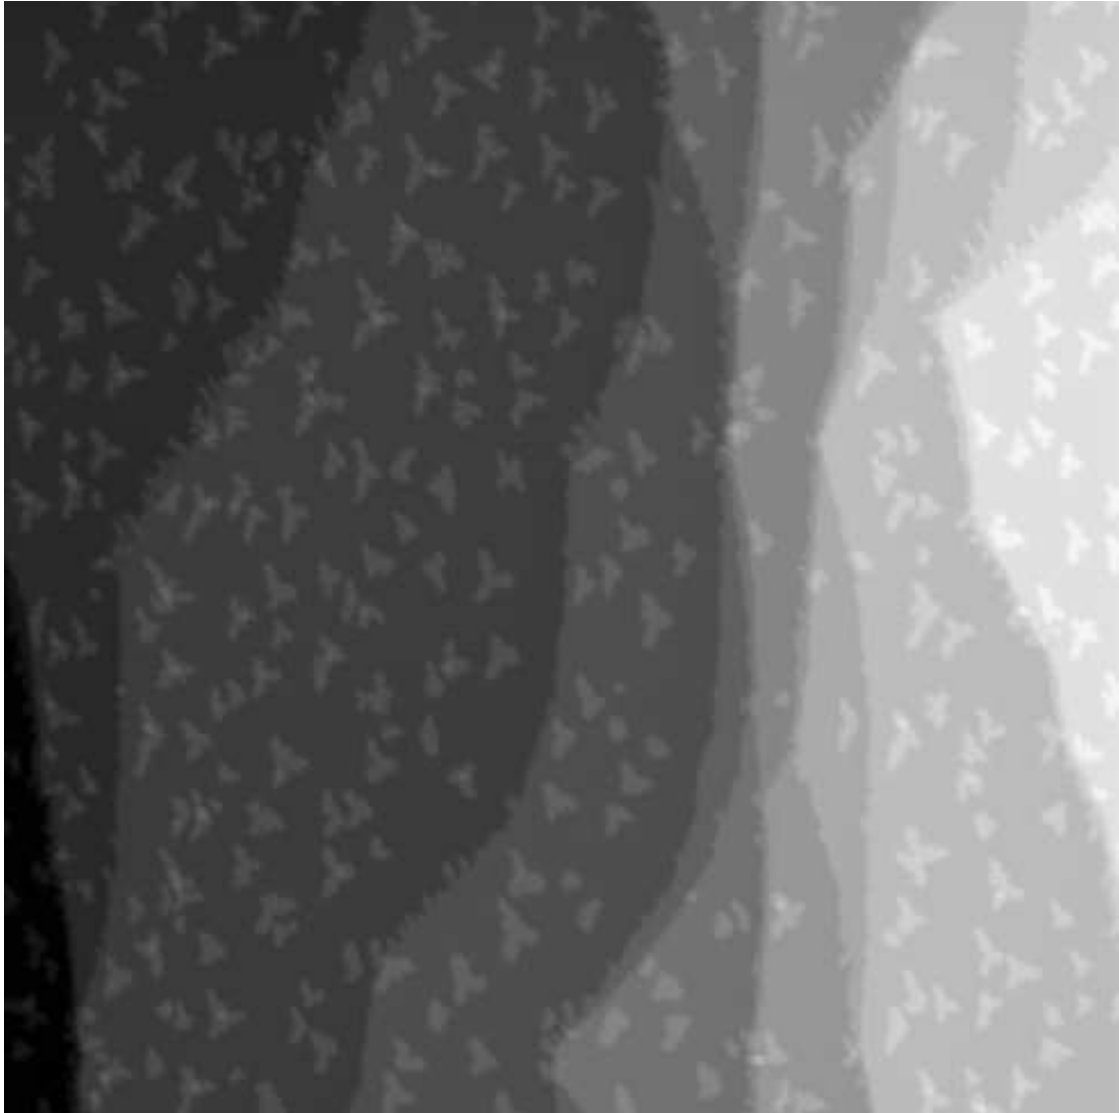

FIG. 7. Coordinates:  $x = 0,4$ ;  $y = 0,8$



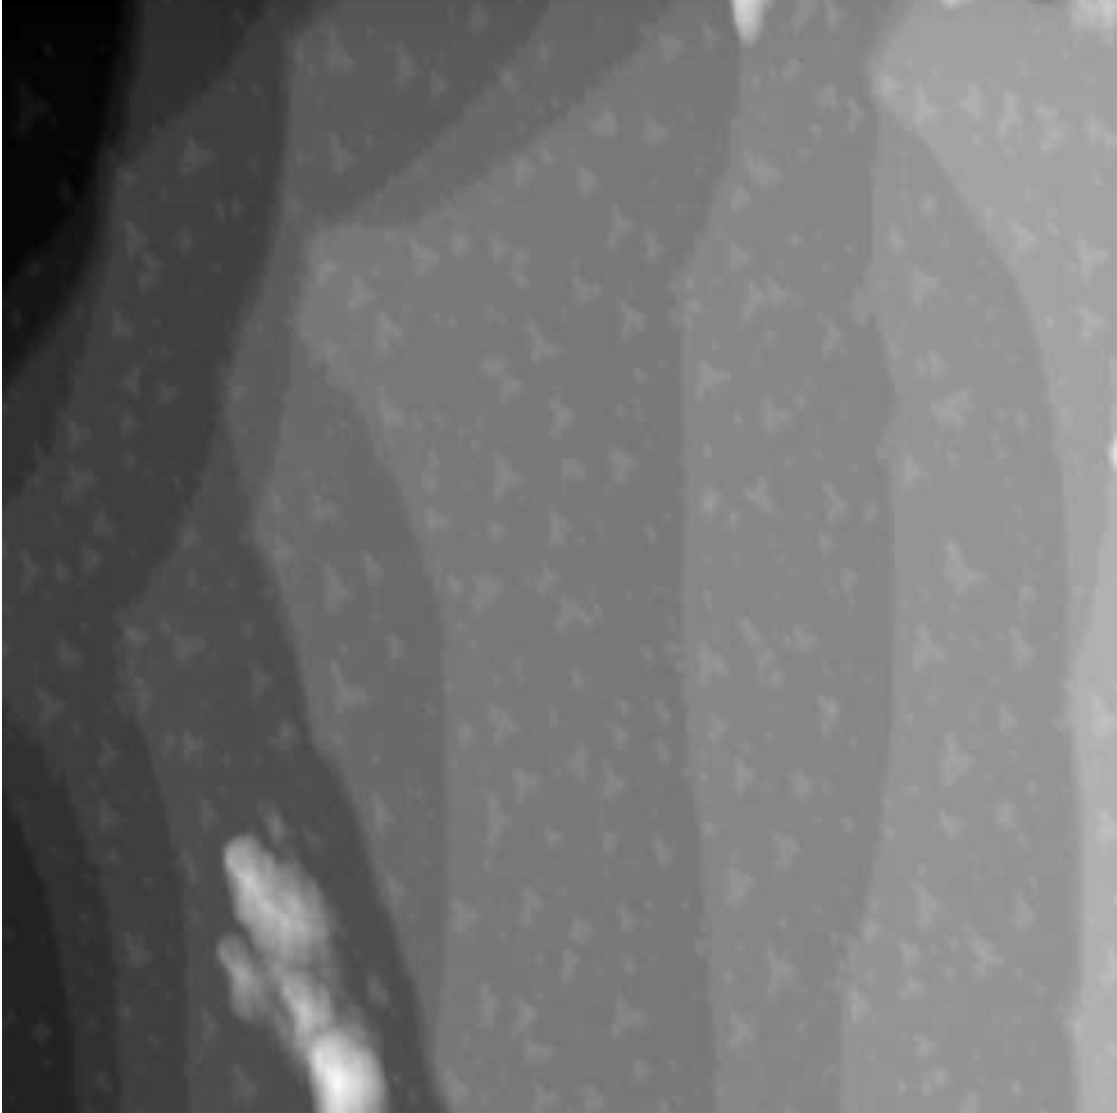

FIG. 8. Coordinates:  $x = 0,4$ ;  $y = 1,5$

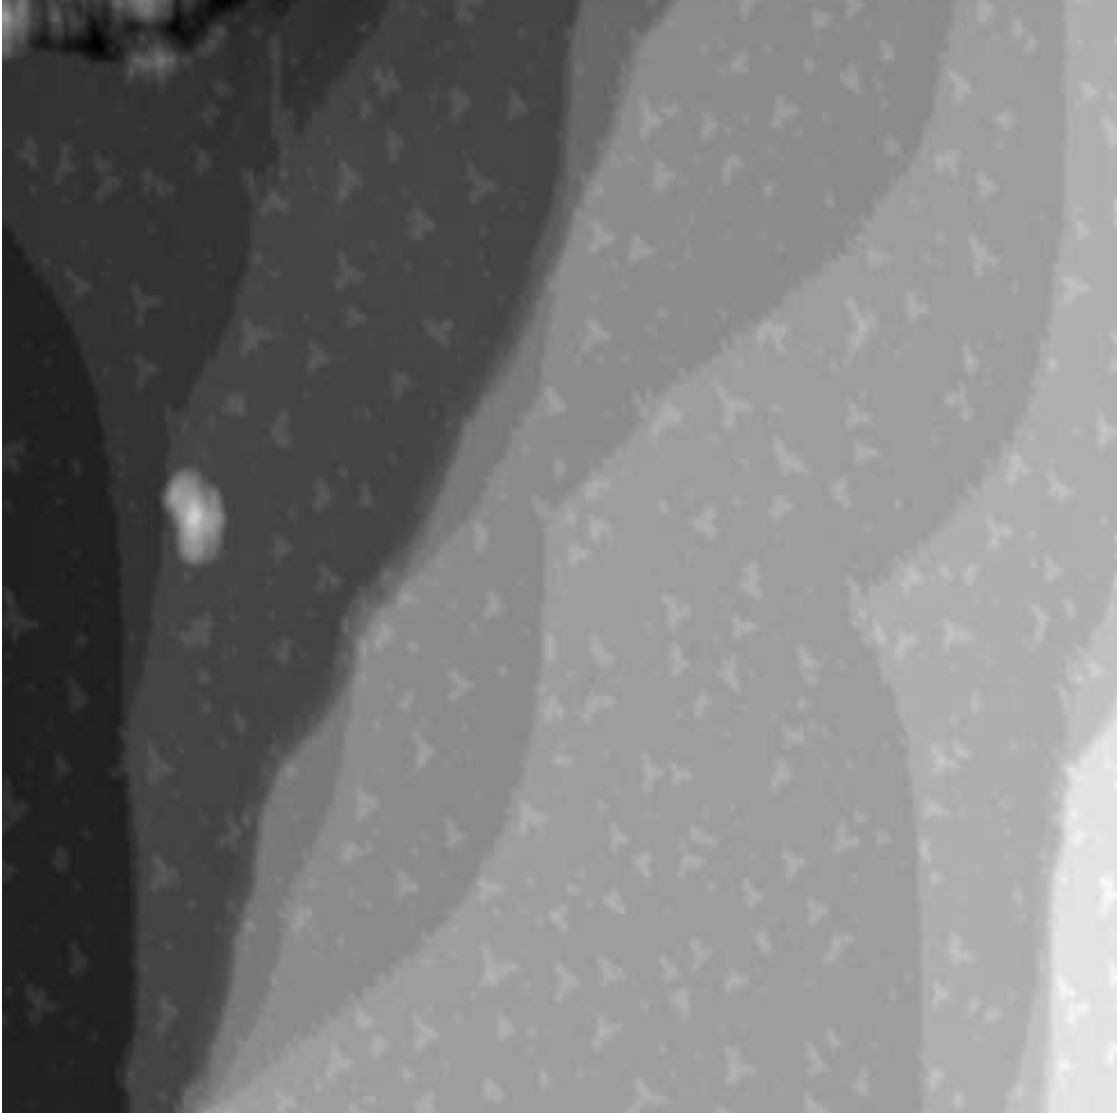

FIG. 9. Coordinates:  $x = 0,4$ ;  $y = 1,8$

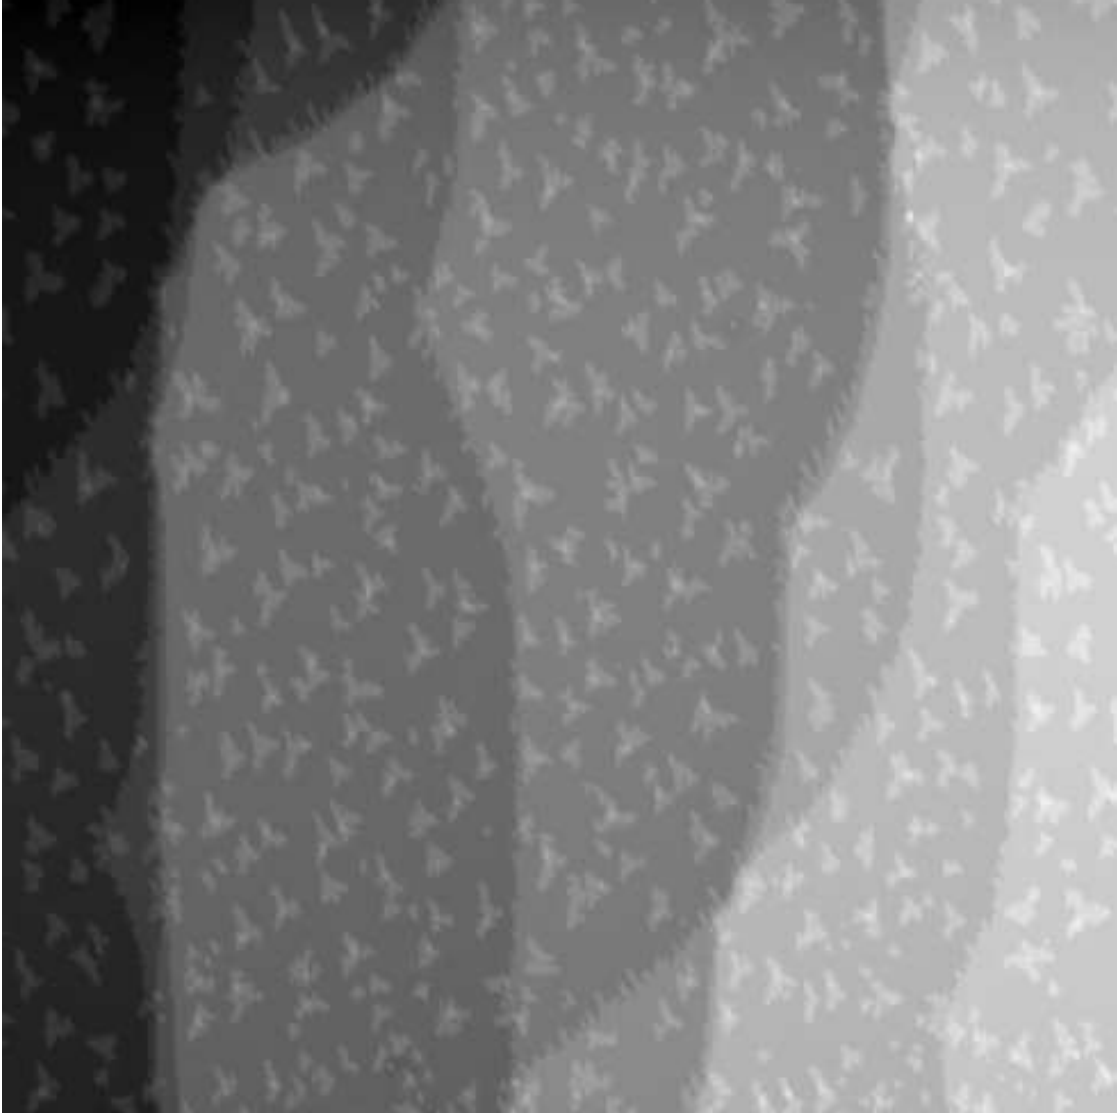

FIG. 10. Coordinates:  $x = 0,5$ ;  $y = 2,0$

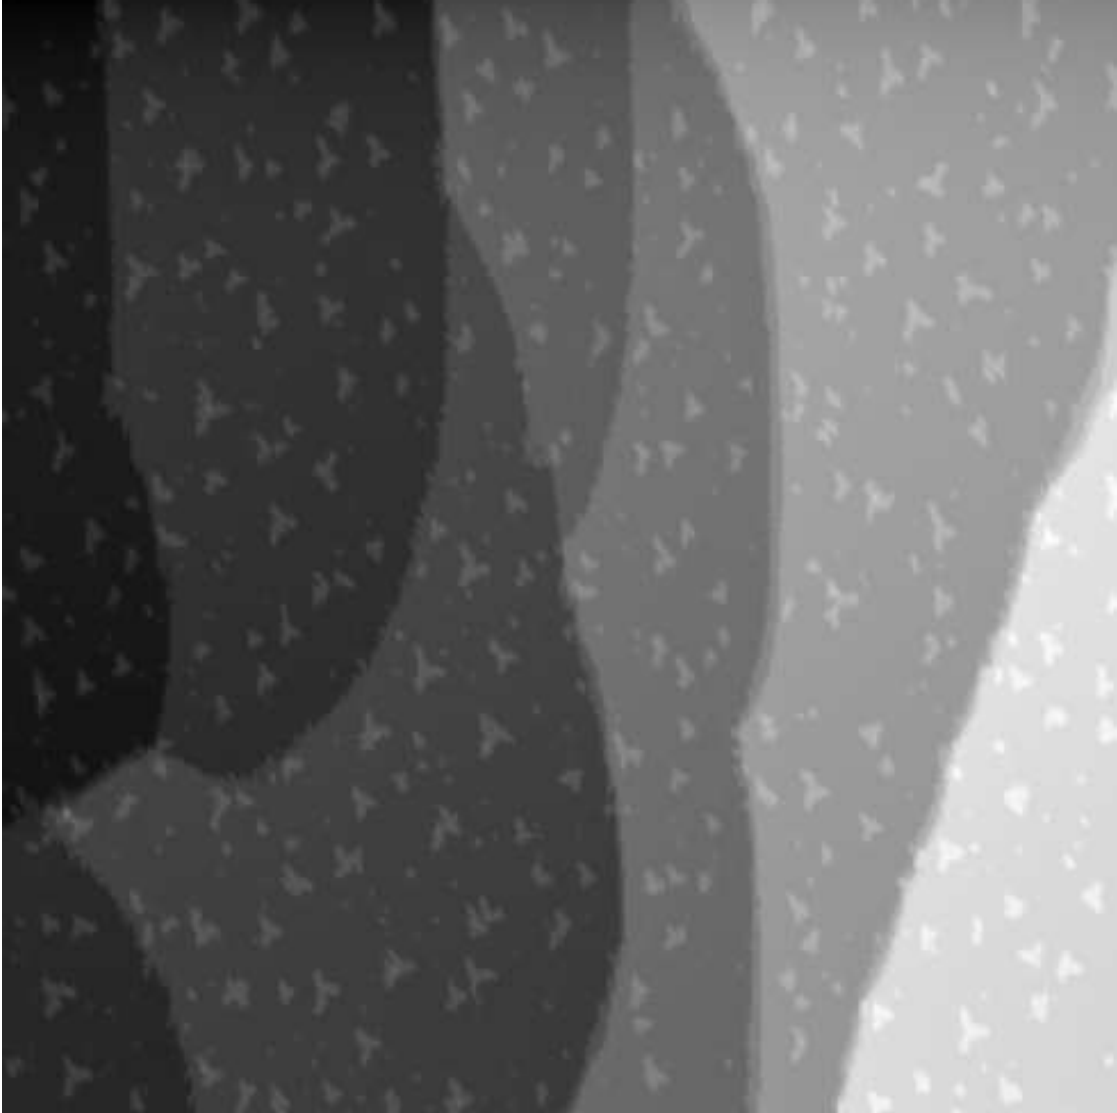

FIG. 11. Coordinates:  $x = 0,5$ ;  $y = 2,2$

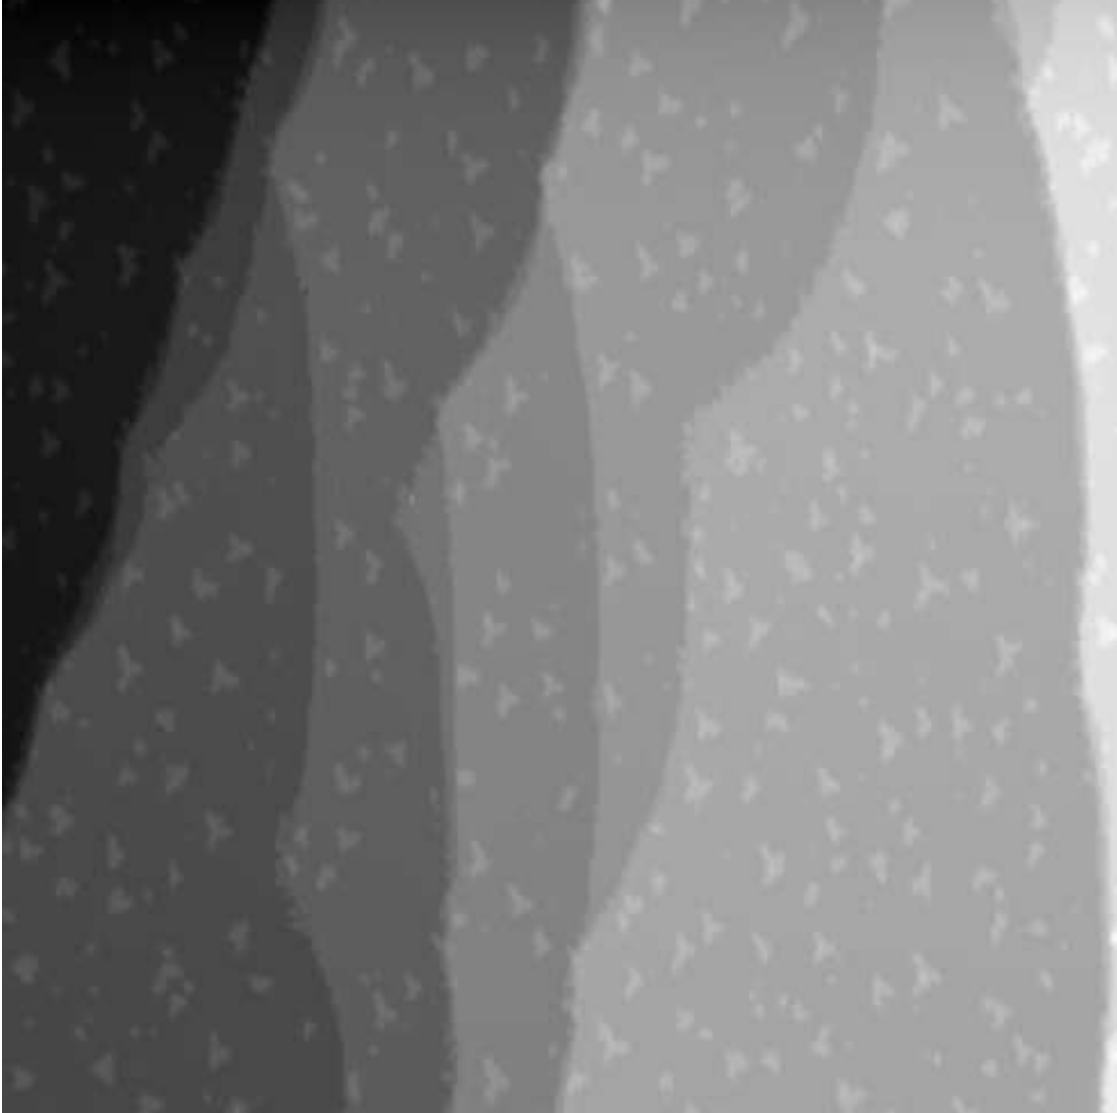

FIG. 12. Coordinates:  $x = 0,6$ ;  $y = 2,4$

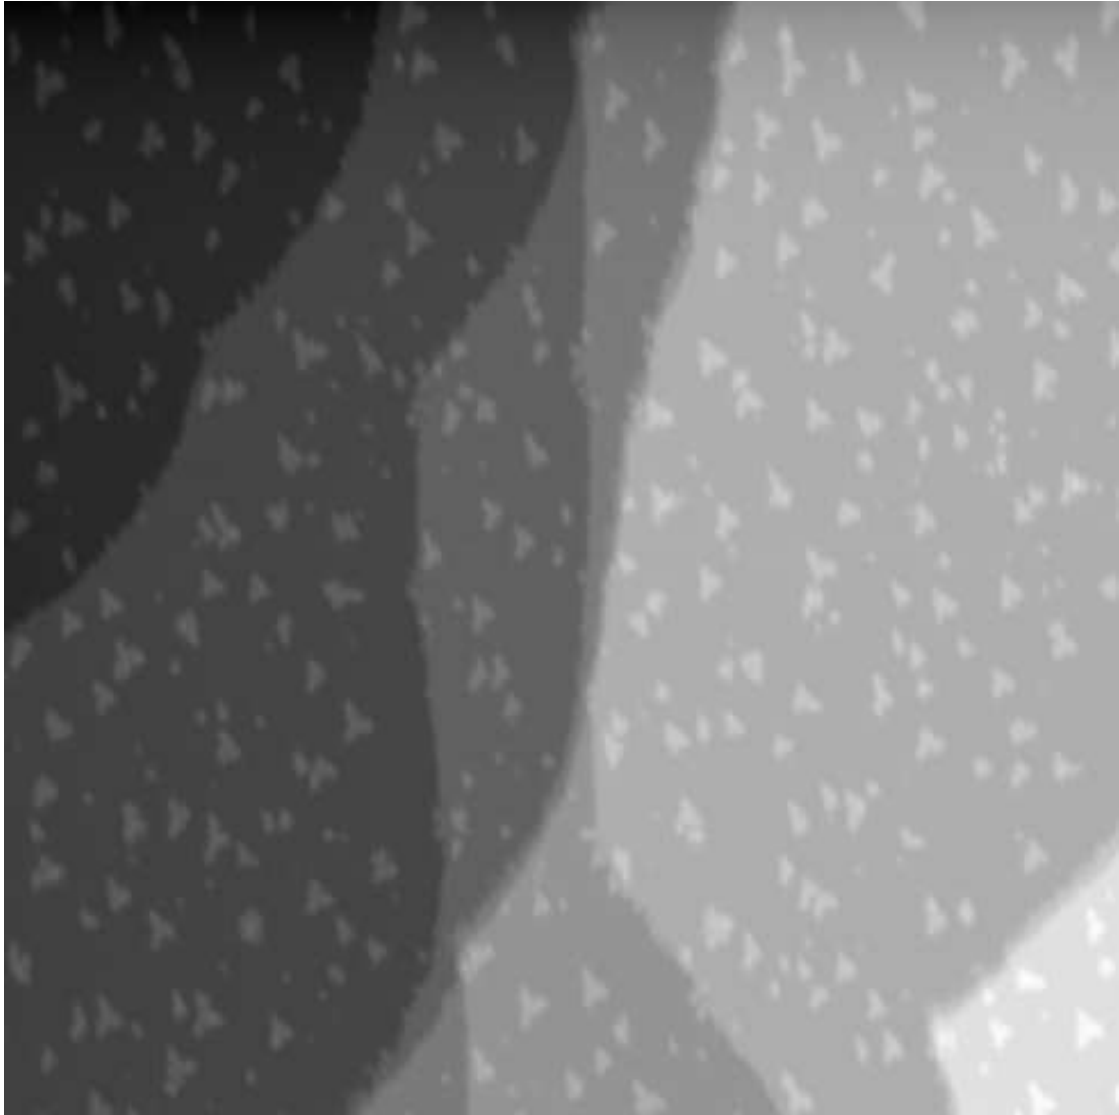

FIG. 13. Coordinates:  $x = 0,6$ ;  $y = 2,8$

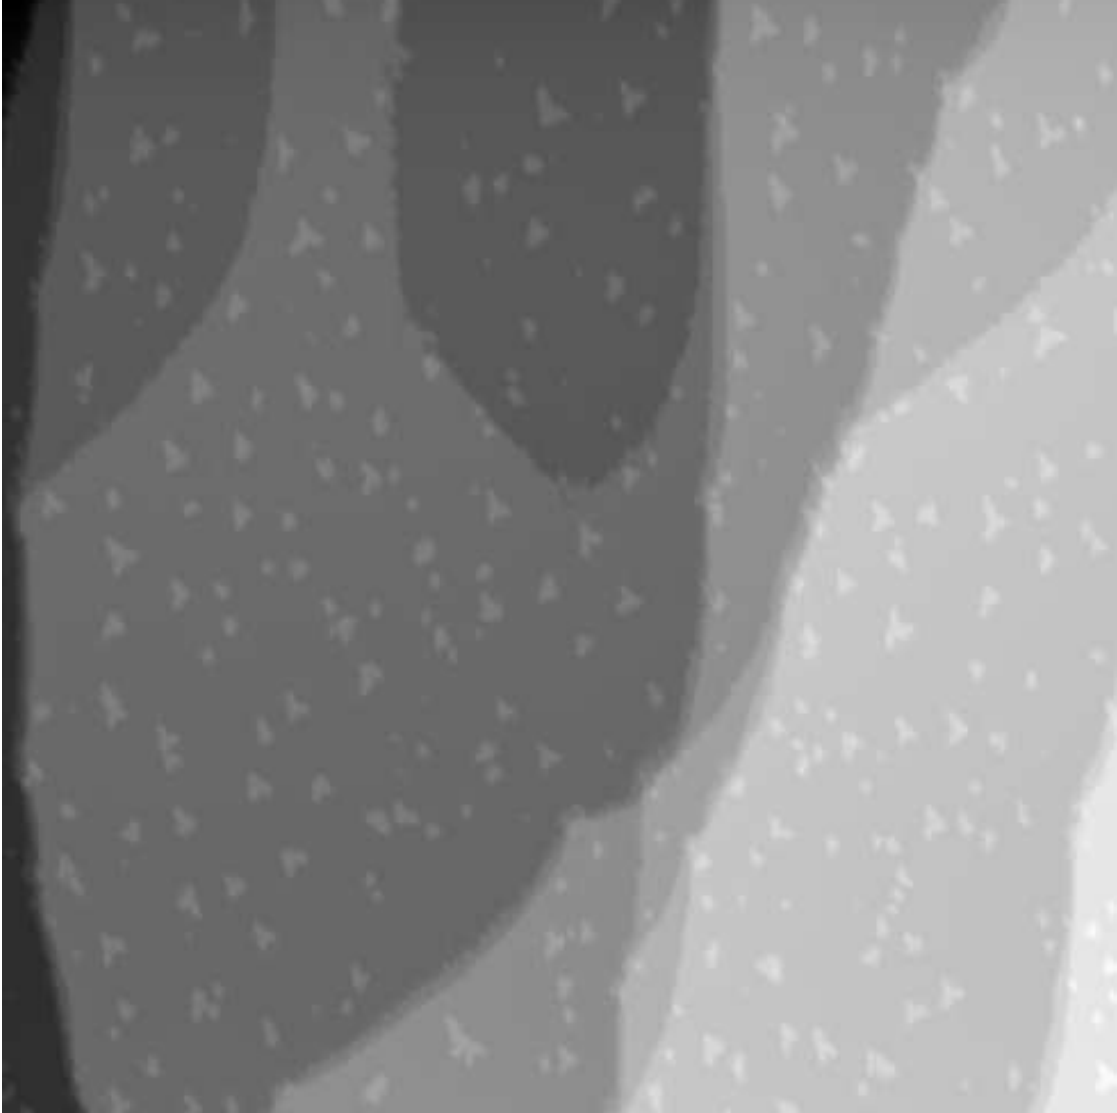

FIG. 14. Coordinates:  $x = 0,7$ ;  $y = 3,2$

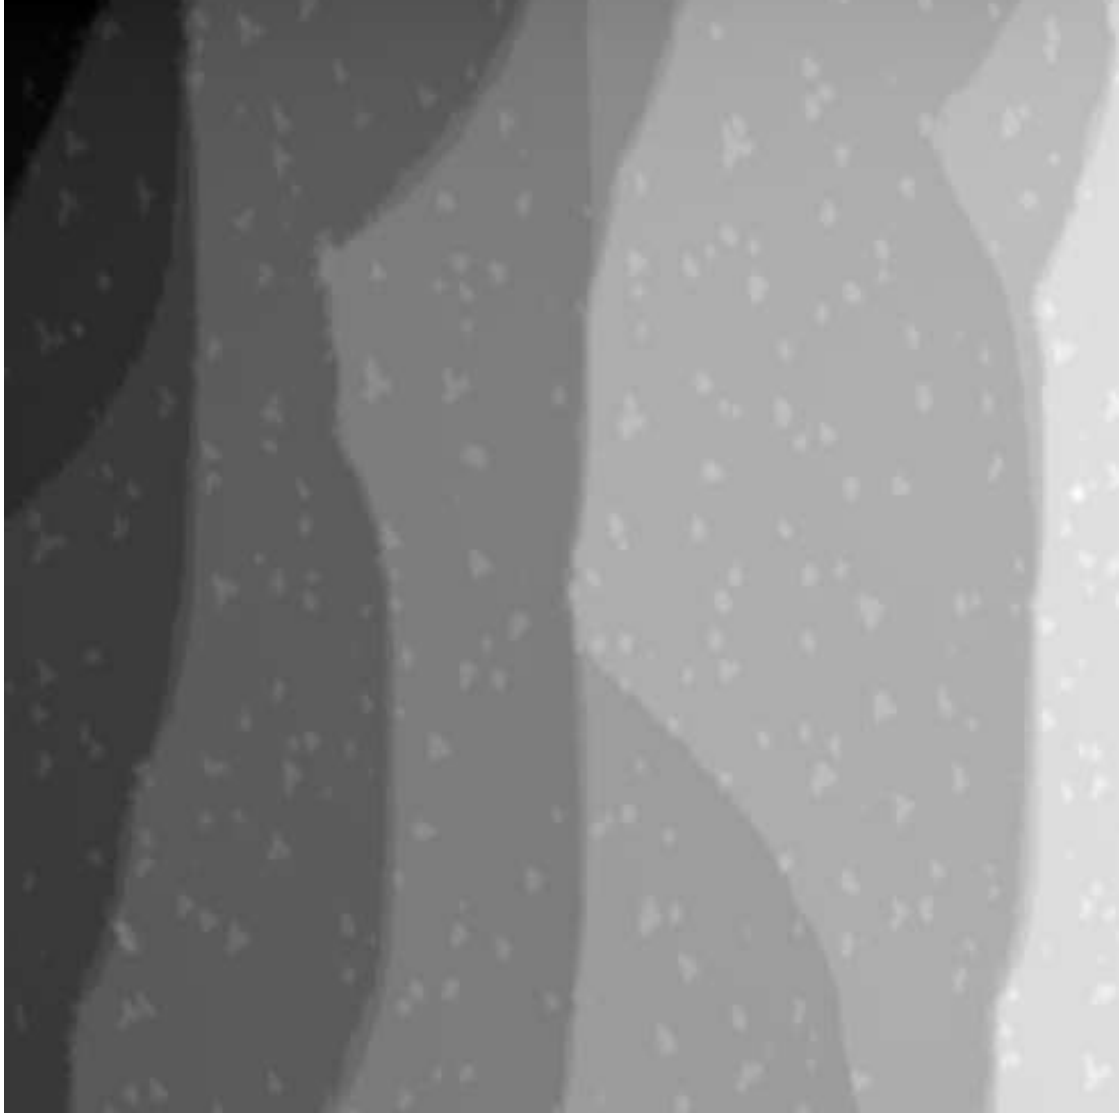

FIG. 15. Coordinates:  $x = 0,7$ ;  $y = 3,5$



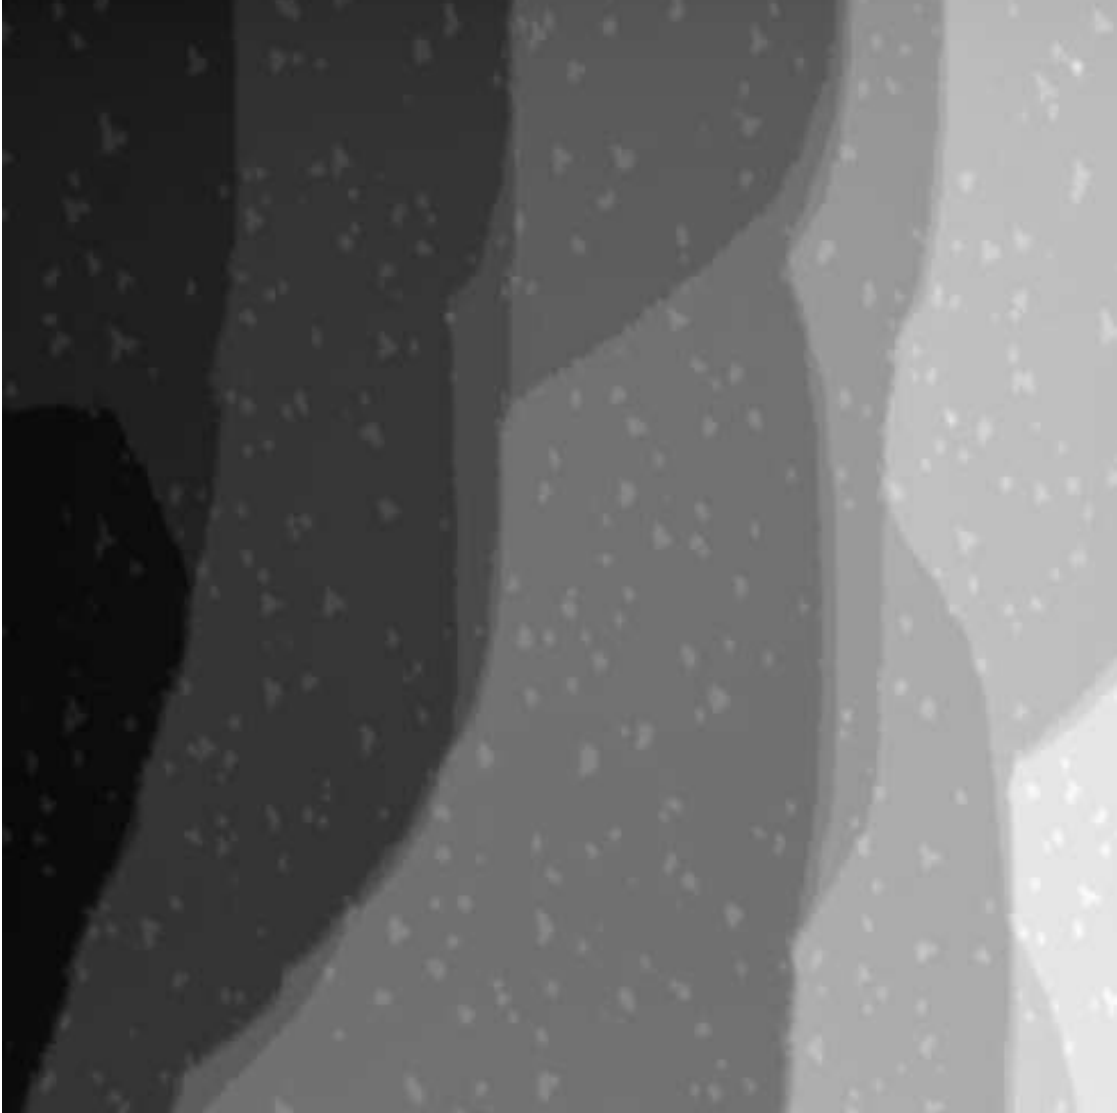

FIG. 16. Coordinates:  $x = 0,8$ ;  $y = 3,8$

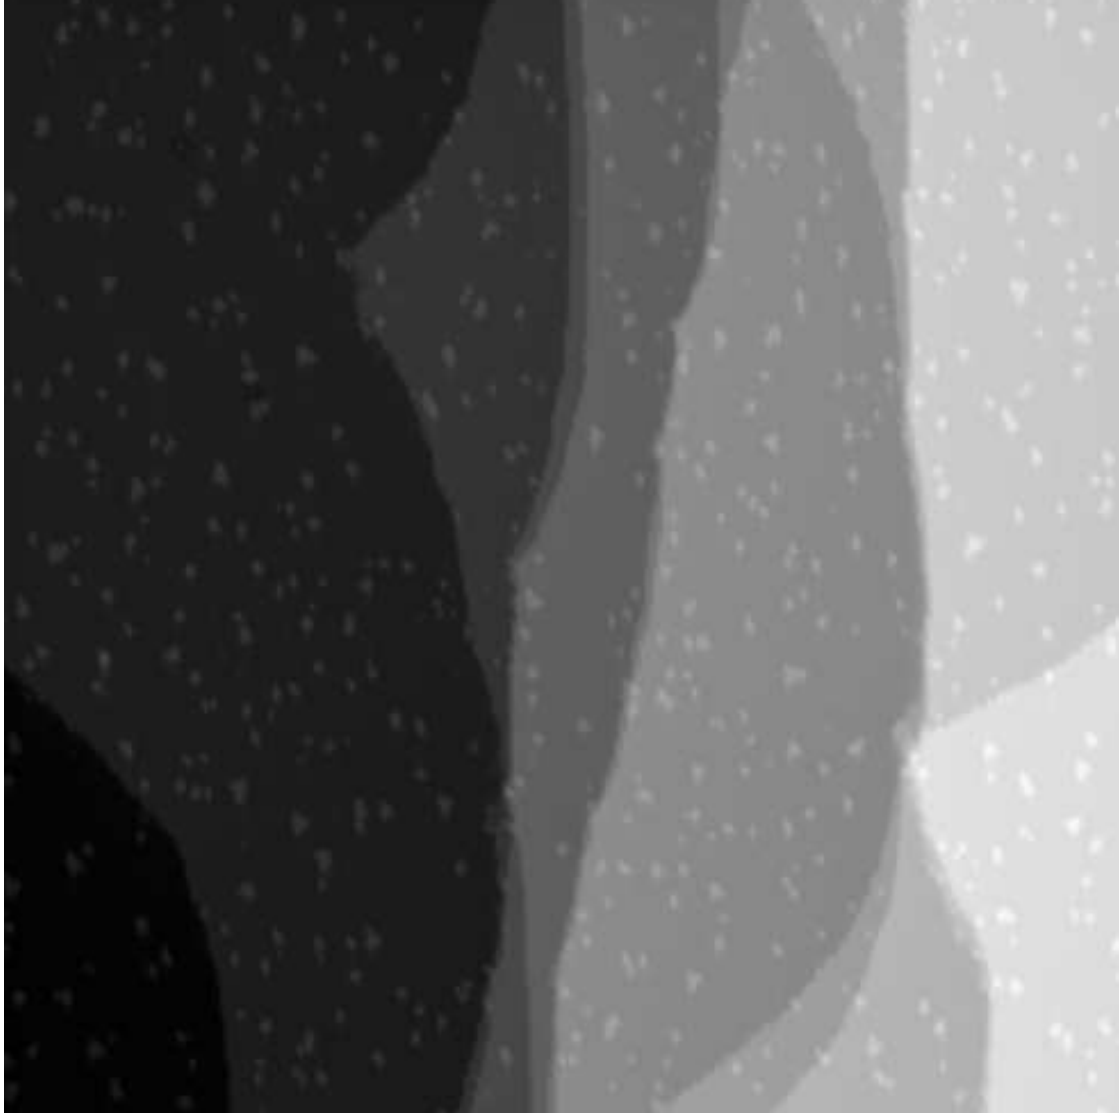

FIG. 17. Coordinates:  $x = 0,8$ ;  $y = 4,3$

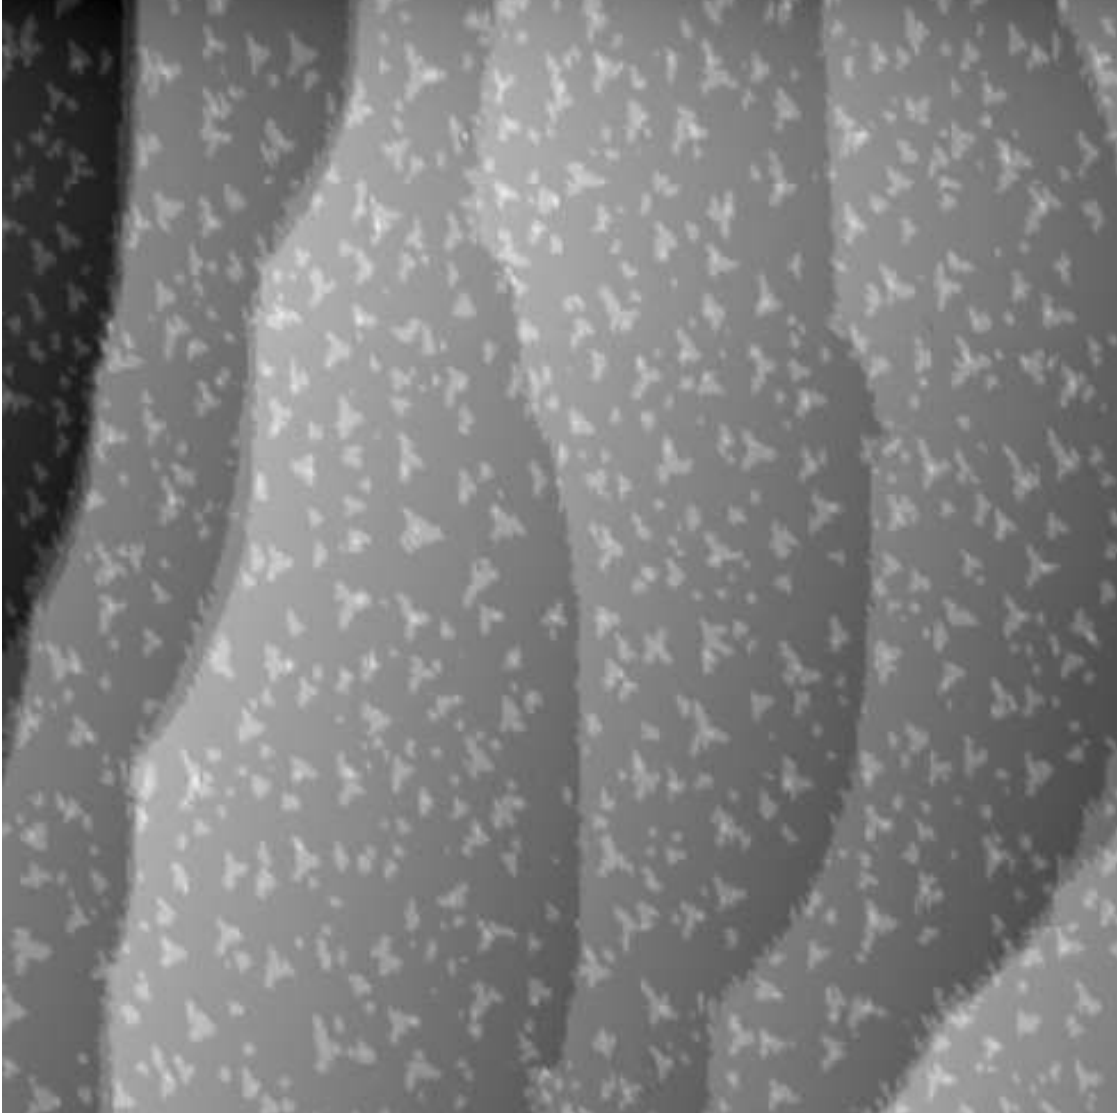

FIG. 18. Coordinates:  $x = 0,9$ ;  $y = 0,2$

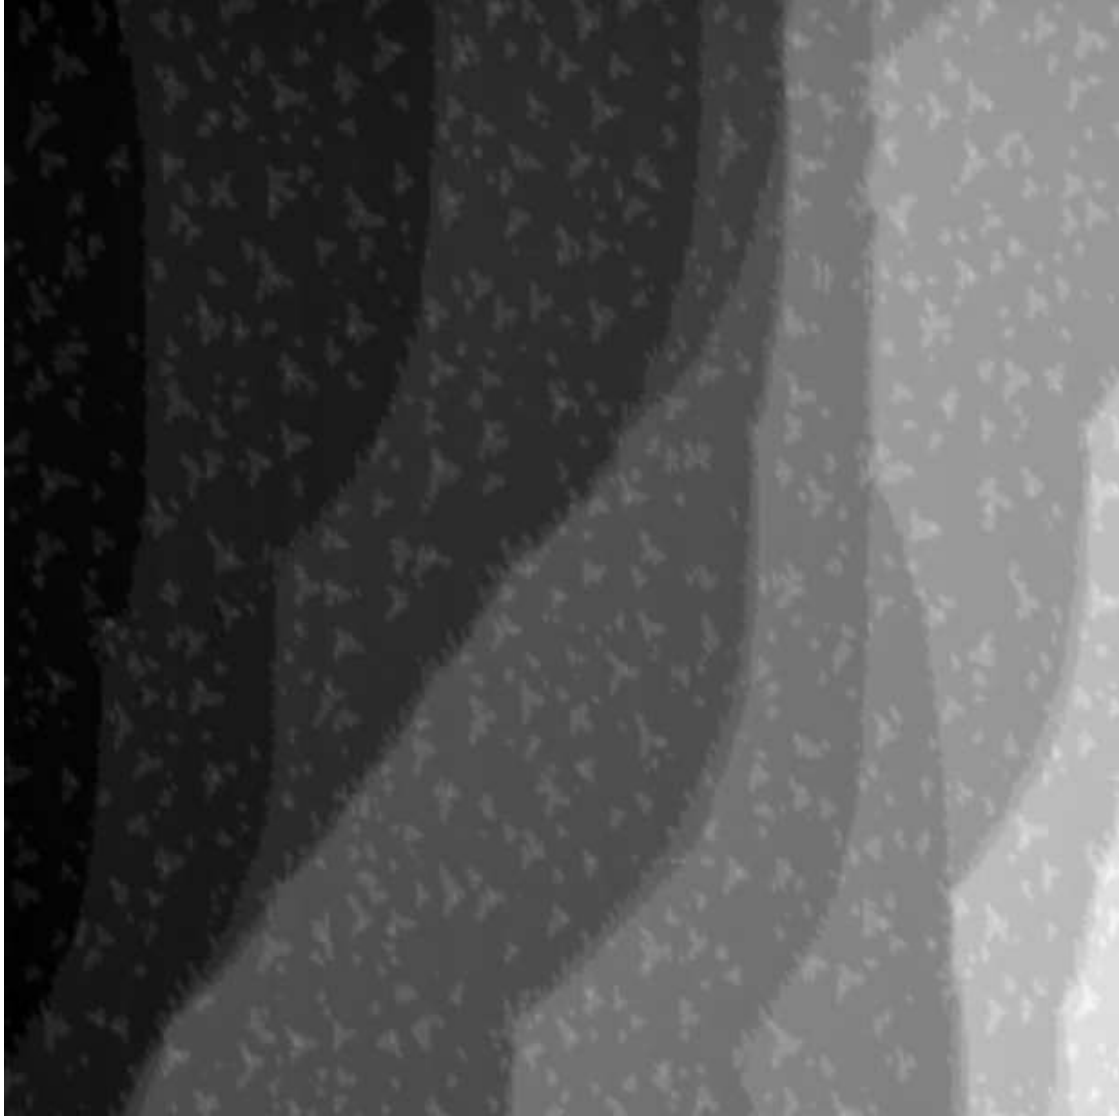

FIG. 19. Coordinates:  $x = 1,0$ ;  $y = 0,3$

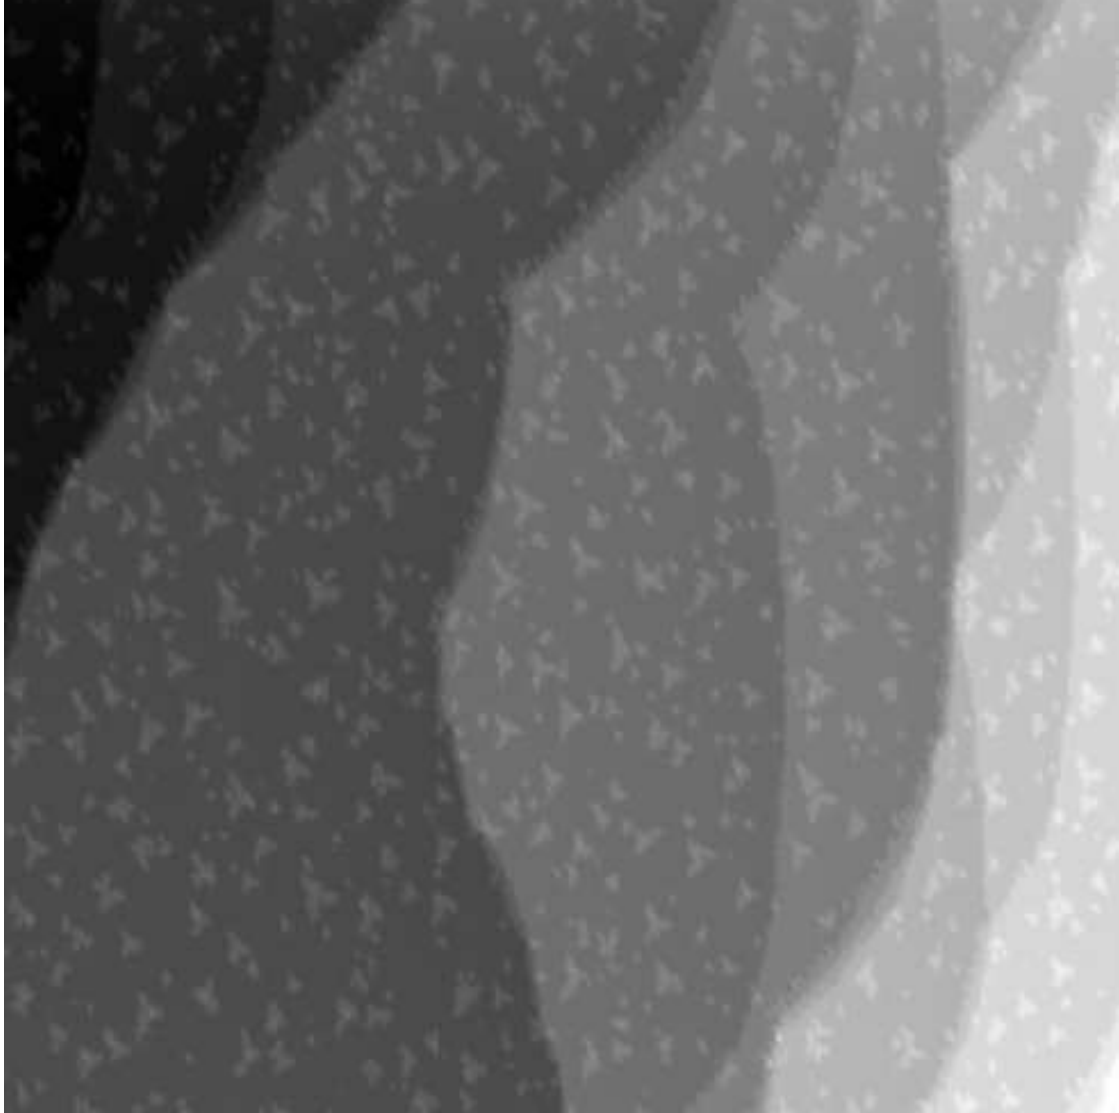

FIG. 20. Coordinates:  $x = 1,2$ ;  $y = 0,3$

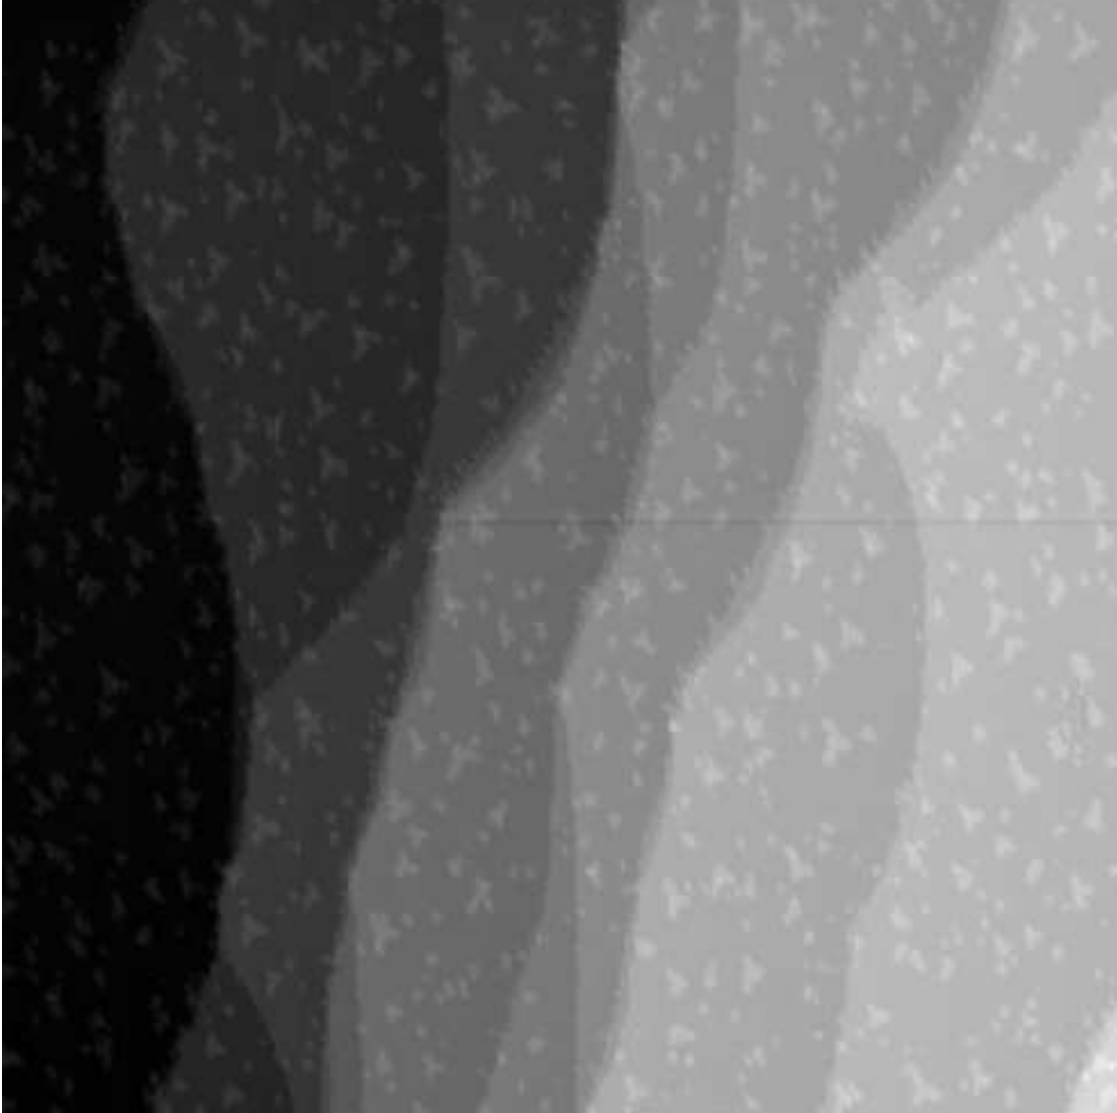

FIG. 21. Coordinates:  $x = 1,4$ ;  $y = 0,2$

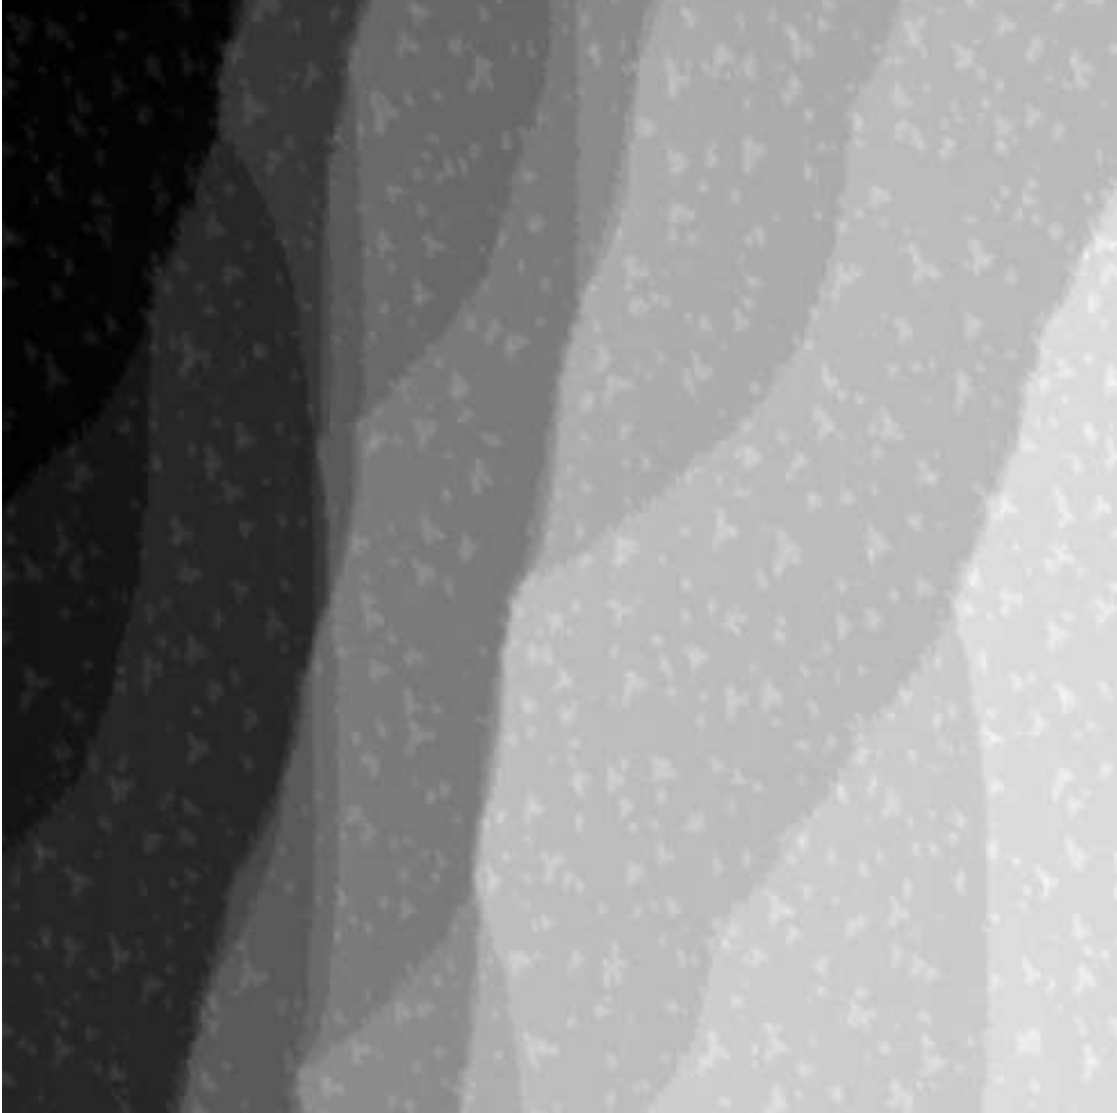

FIG. 22. Coordinates:  $x = 1,6$ ;  $y = 0,2$

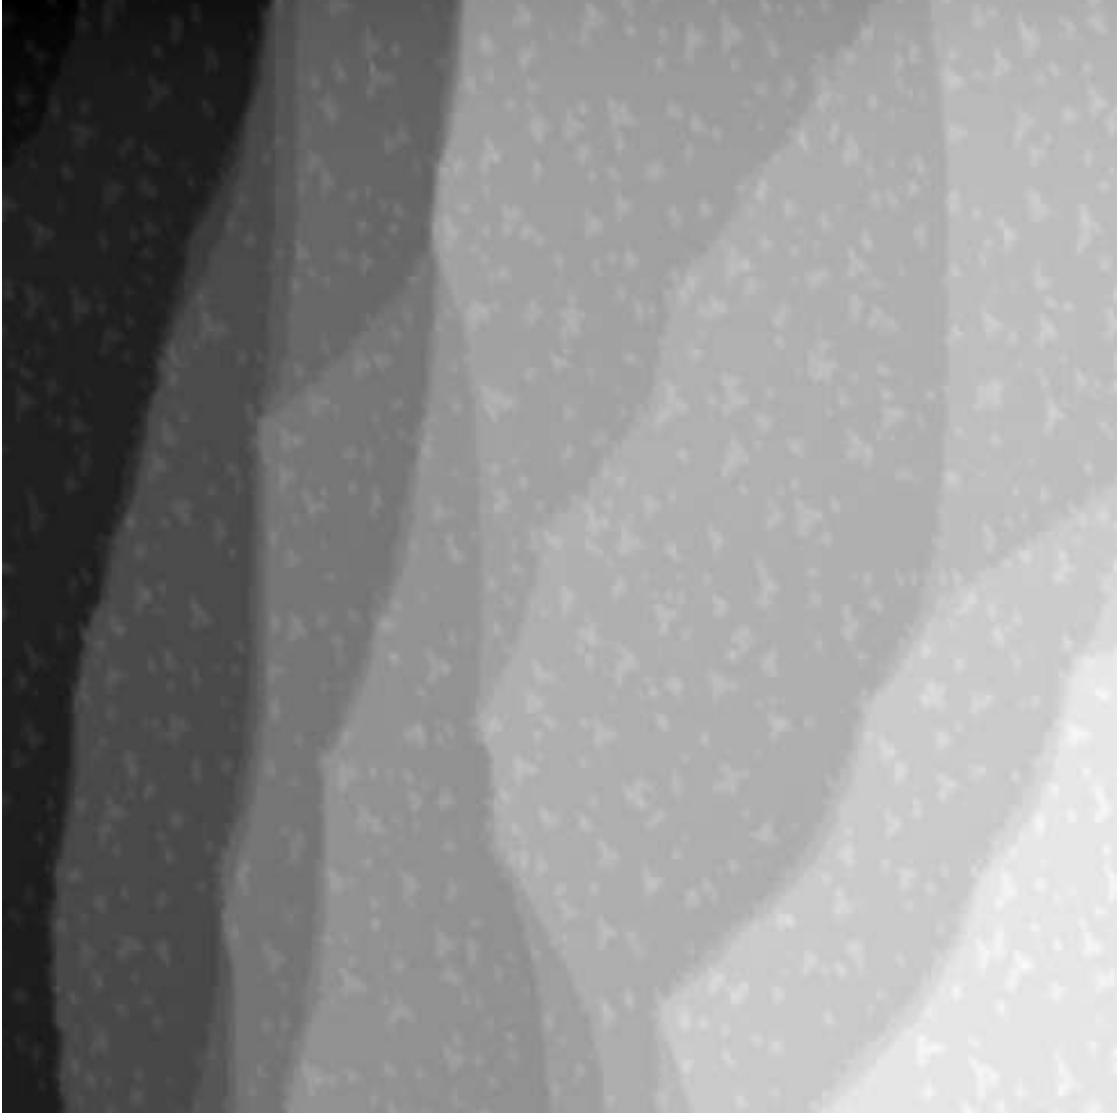

FIG. 23. Coordinates:  $x = 1,8$ ;  $y = 0,4$



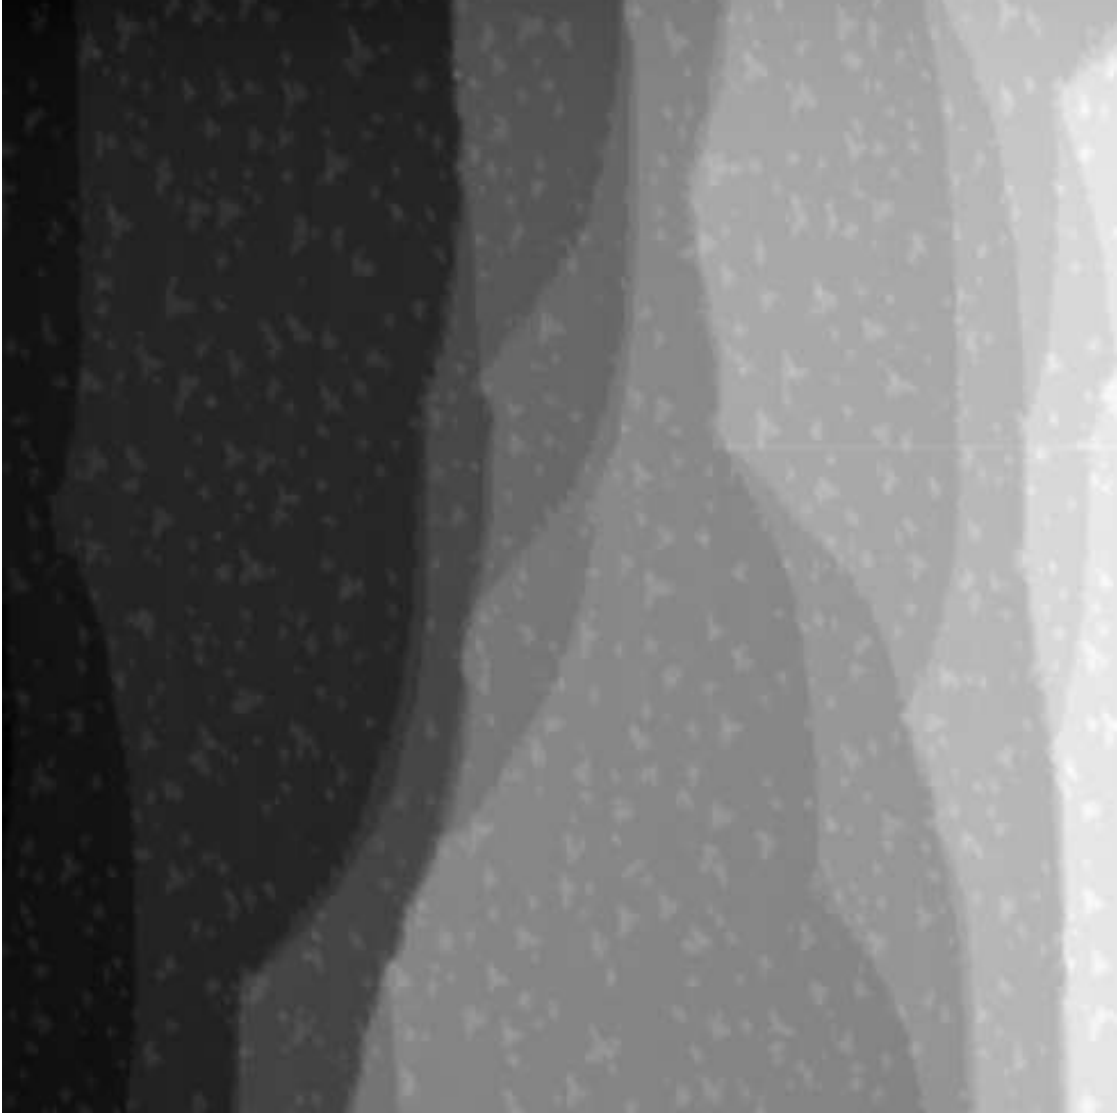

FIG. 24. Coordinates:  $x = 2,0$ ;  $y = 0,1$

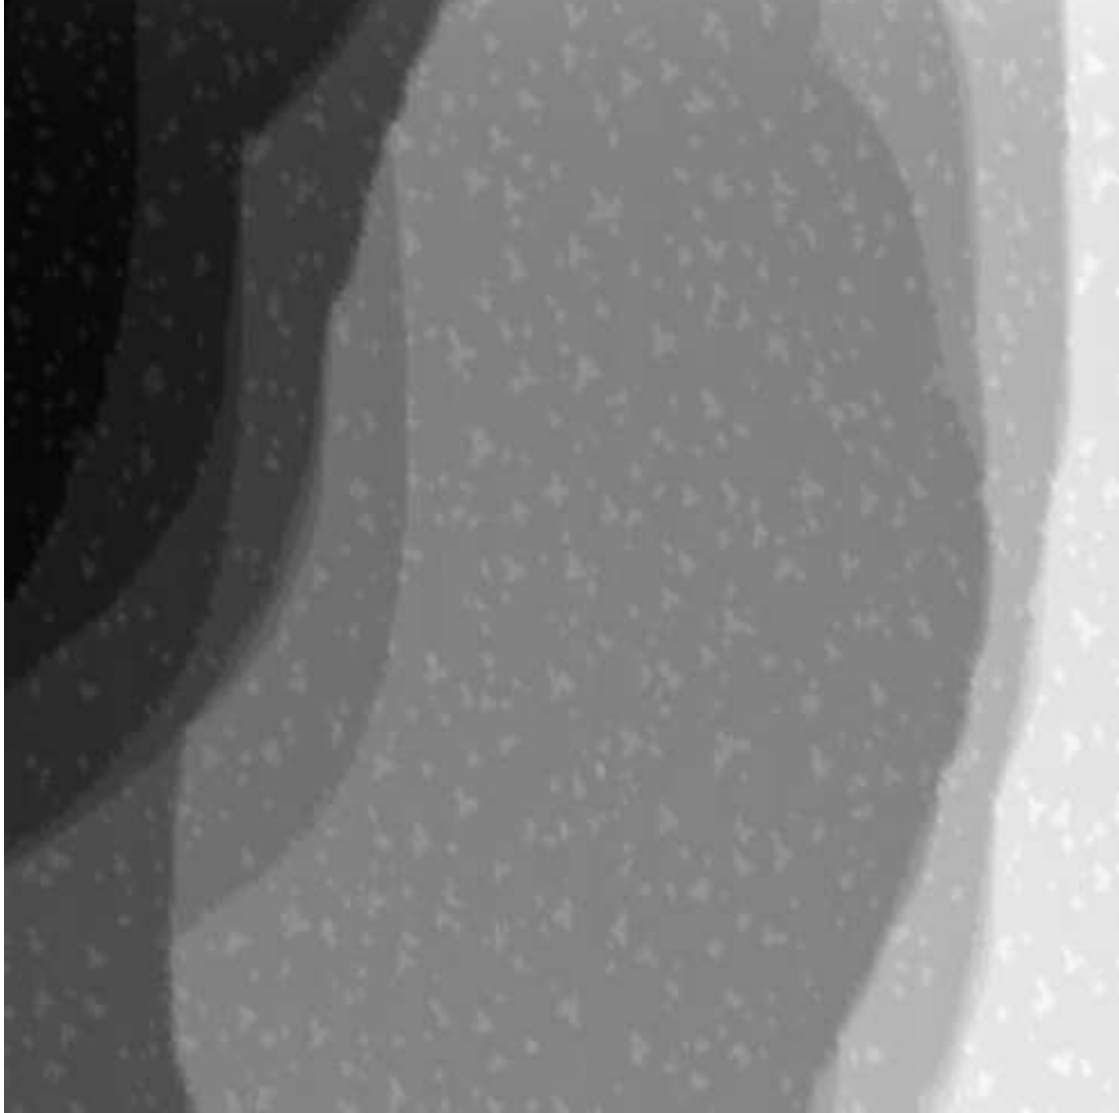

FIG. 25. Coordinates:  $x = 2,2$ ;  $y = 0,1$

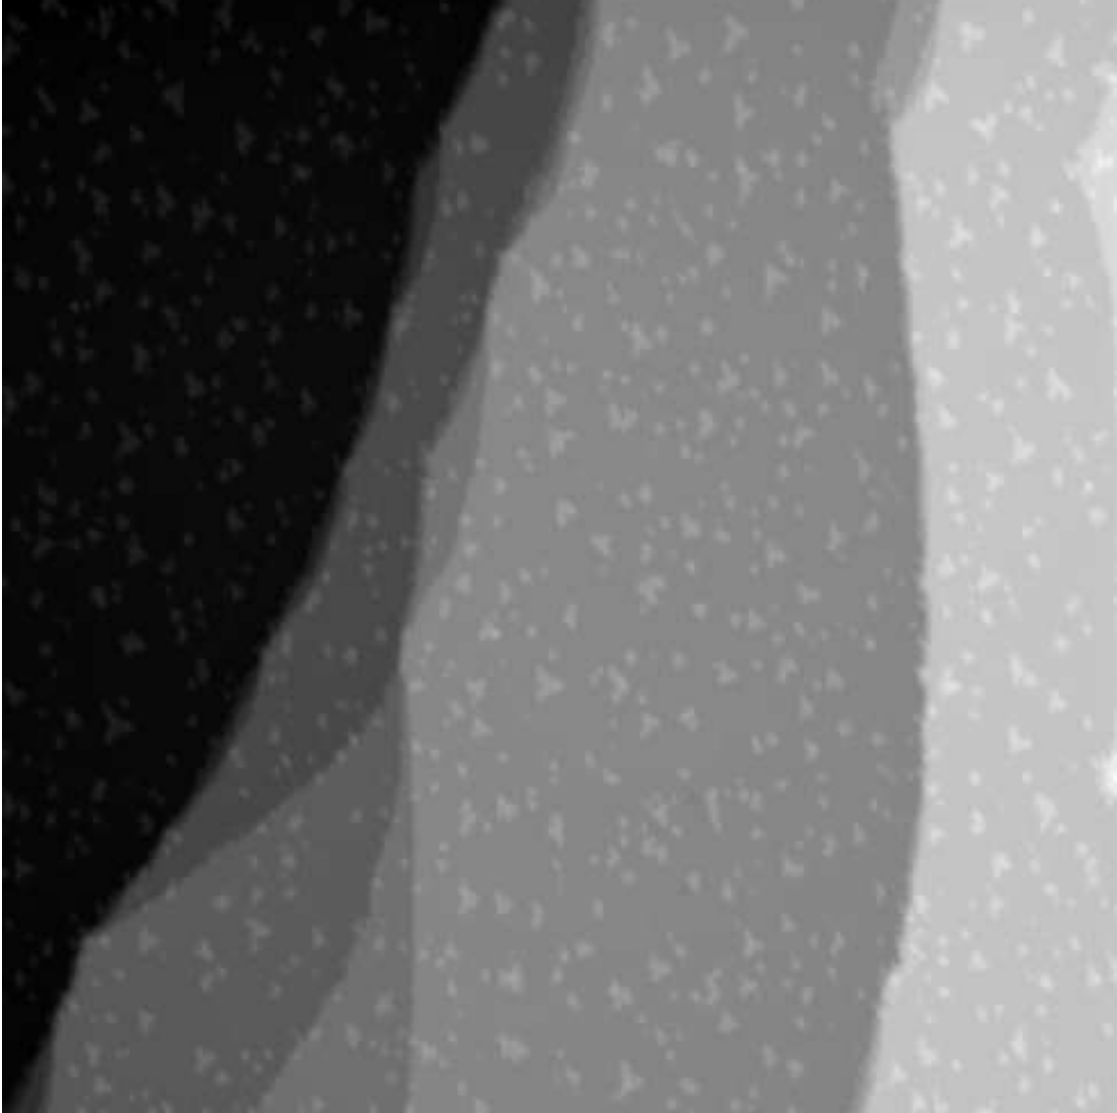

FIG. 26. Coordinates:  $x = 2,5$ ;  $y = 0,4$

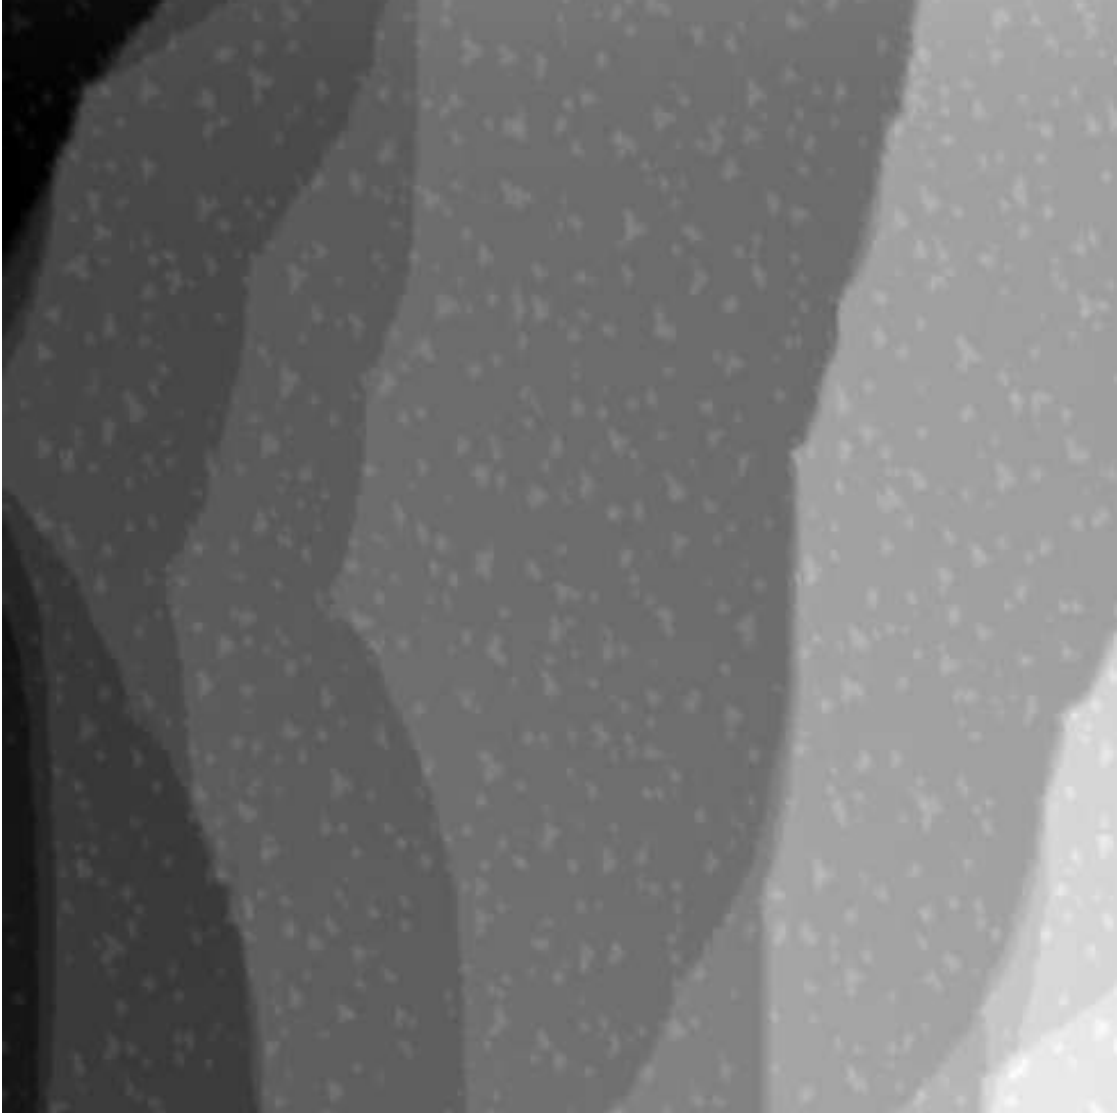

FIG. 27. Coordinates:  $x = 2,7$ ;  $y = 0,4$

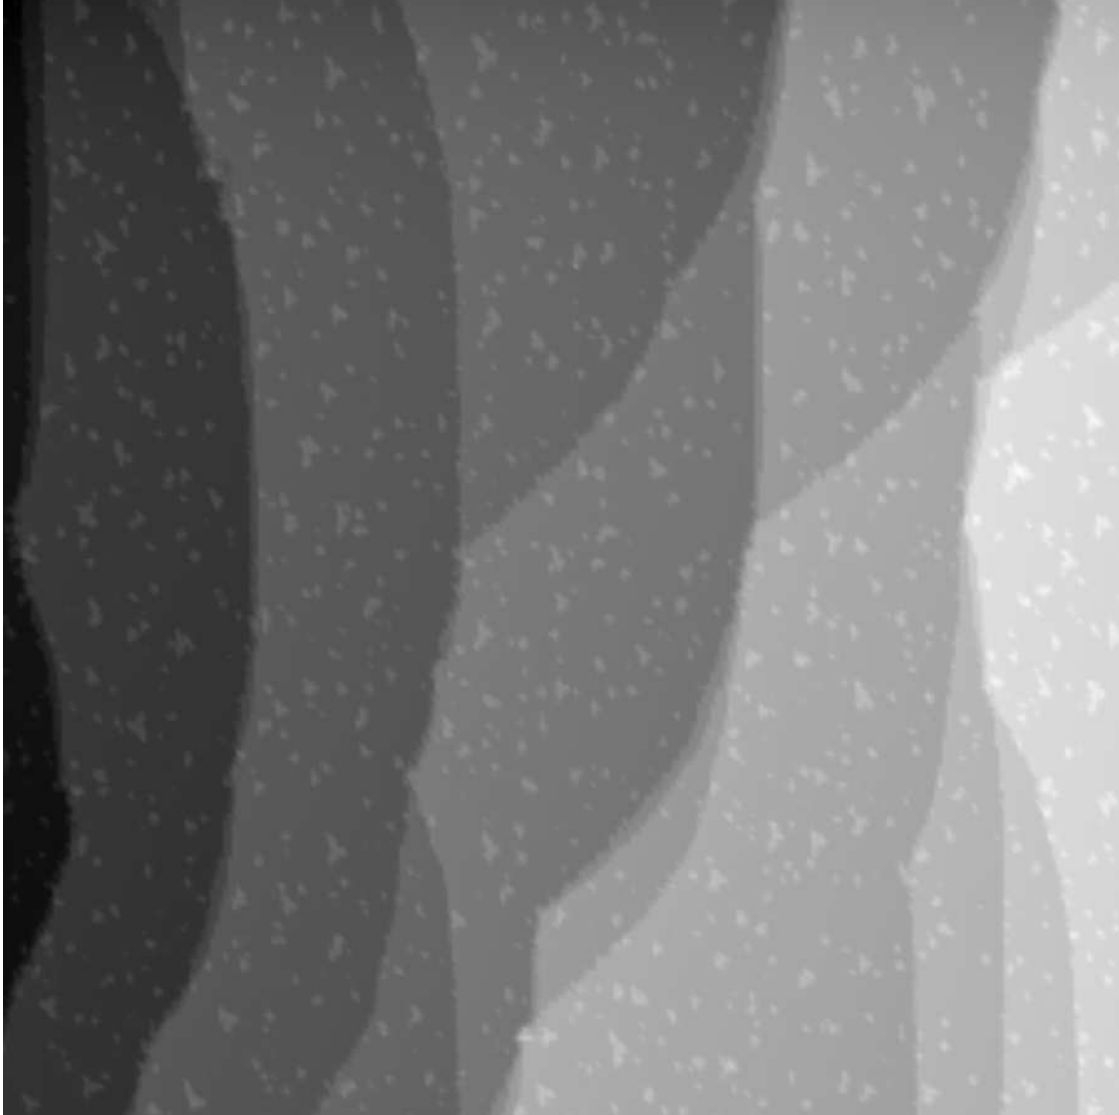

FIG. 28. Coordinates:  $x = 2,9$ ;  $y = 0,4$

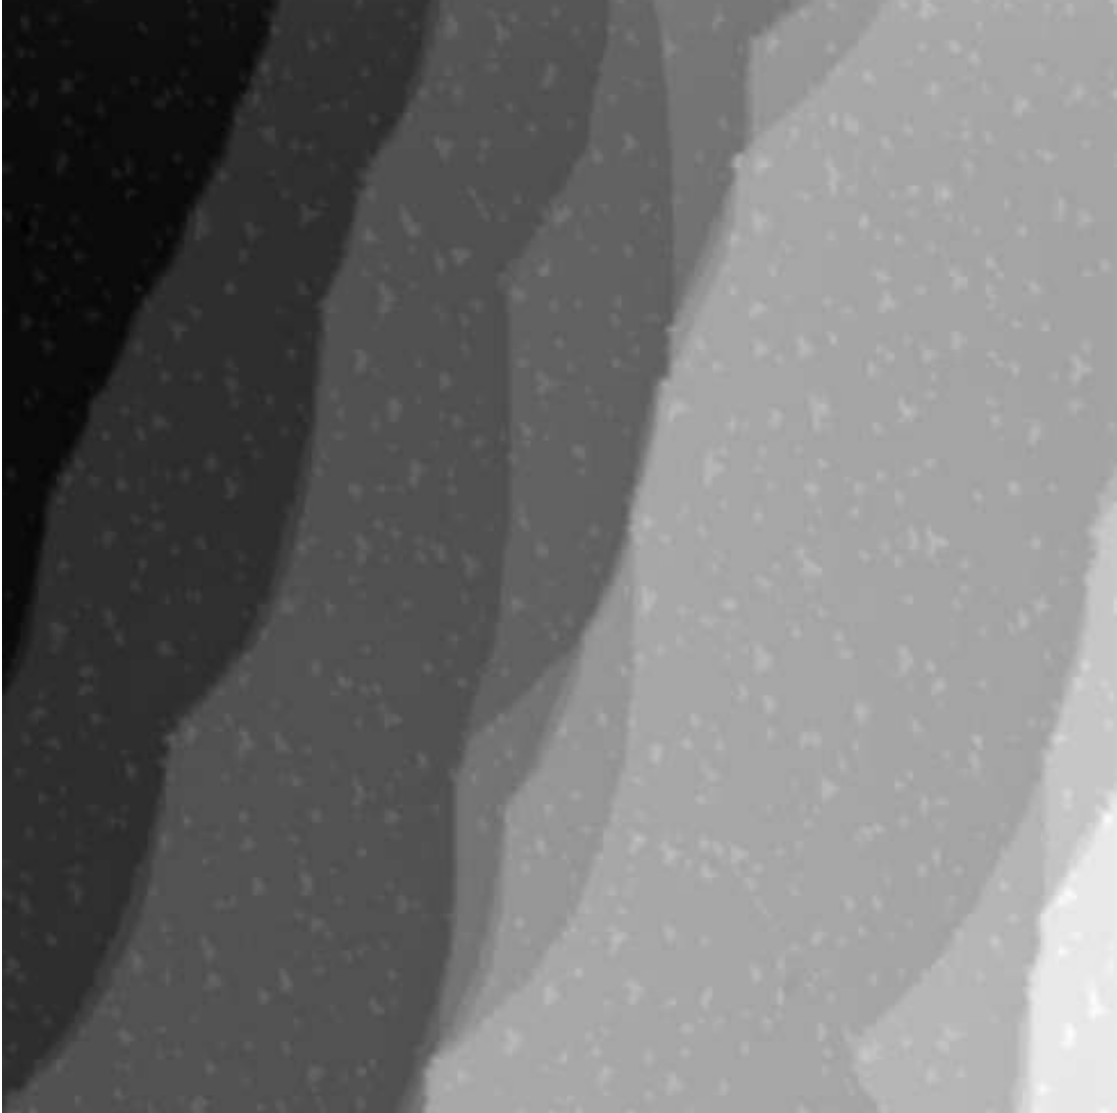

FIG. 29. Coordinates:  $x = 3,2$ ;  $y = 0,3$

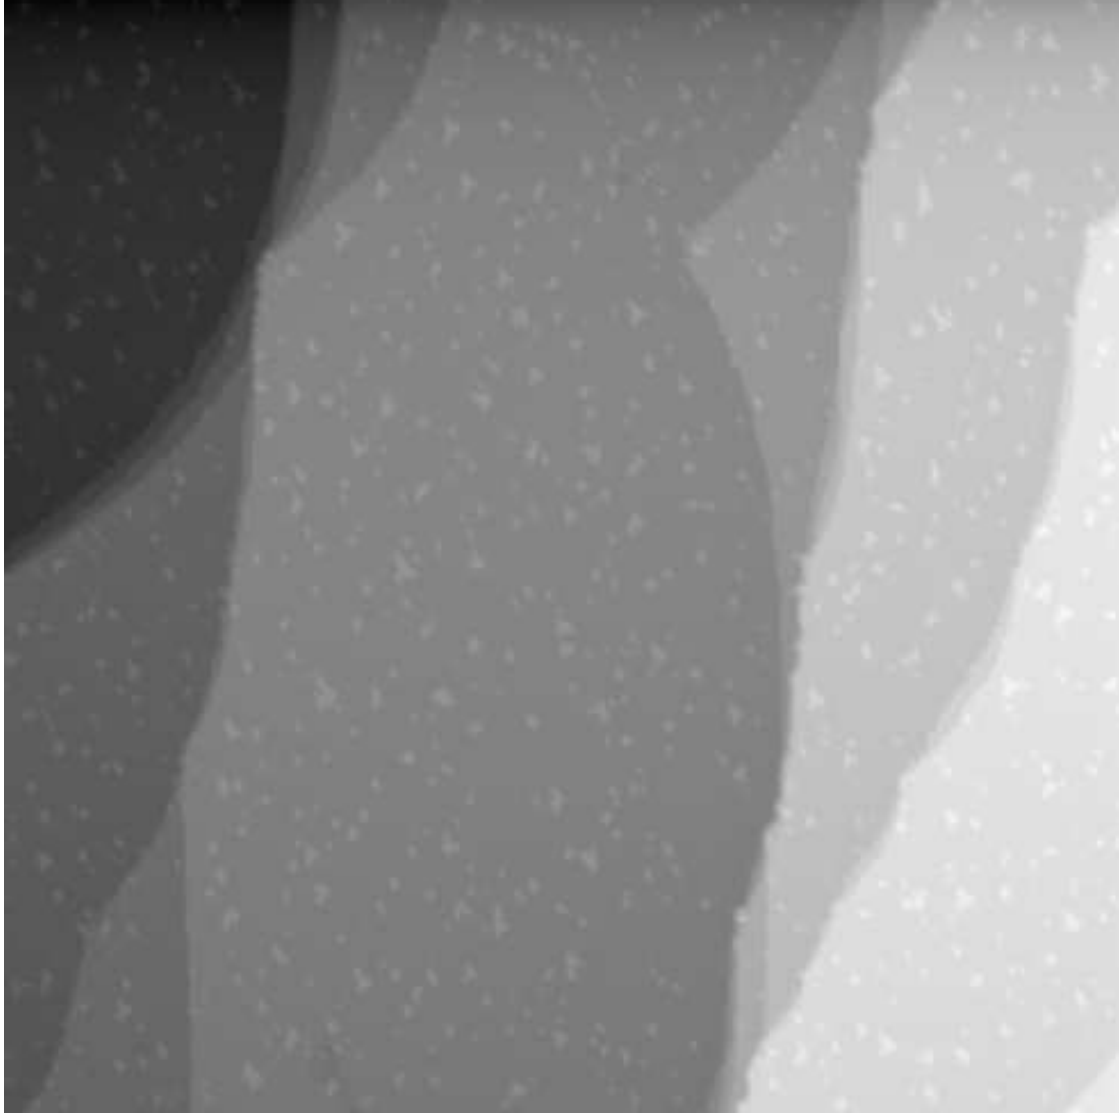

FIG. 30. Coordinates:  $x = 3,4$ ;  $y = 0,4$

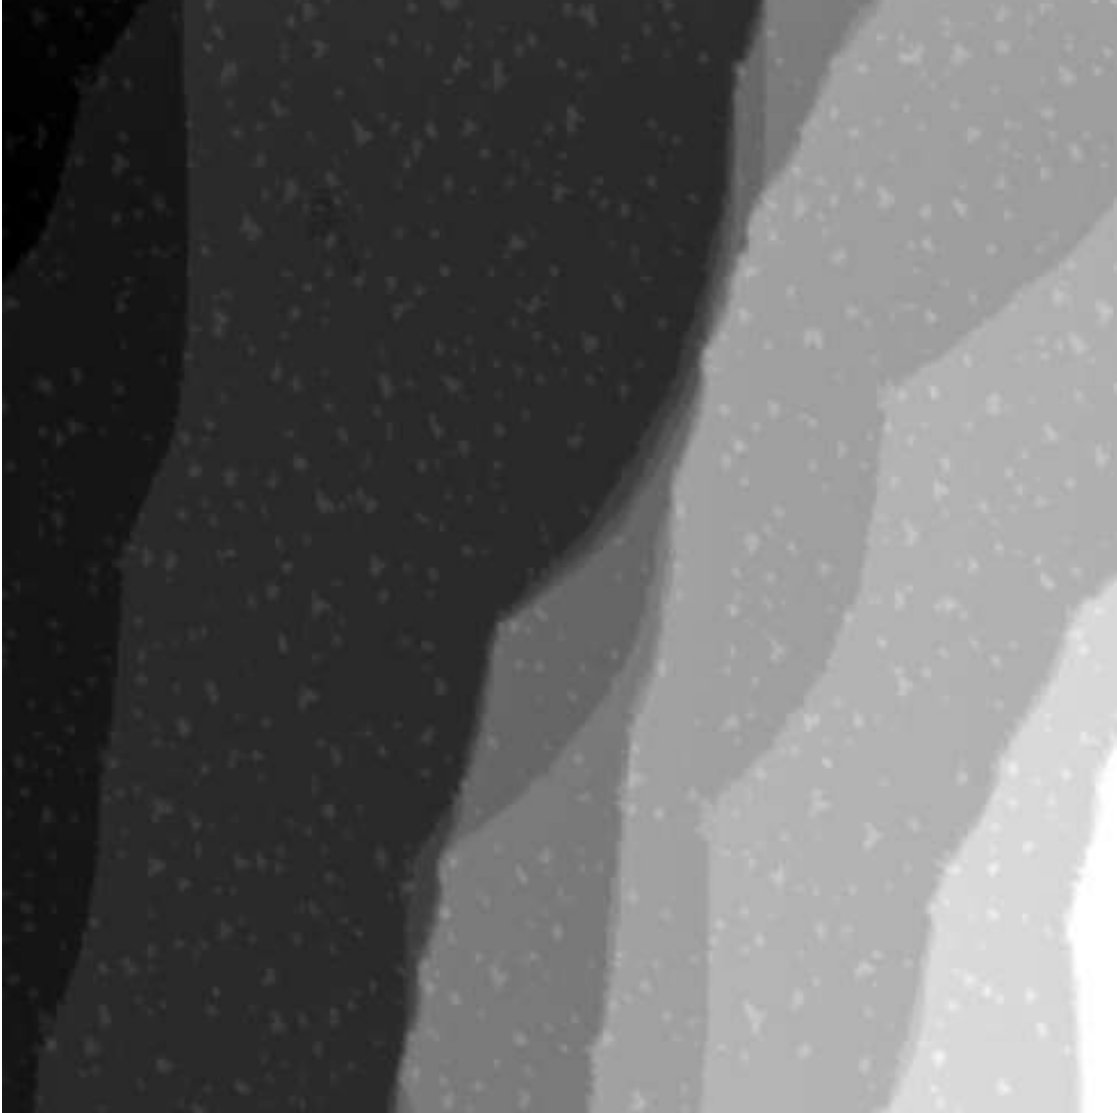

FIG. 31. Coordinates:  $x = 3,6$ ;  $y = 0,2$



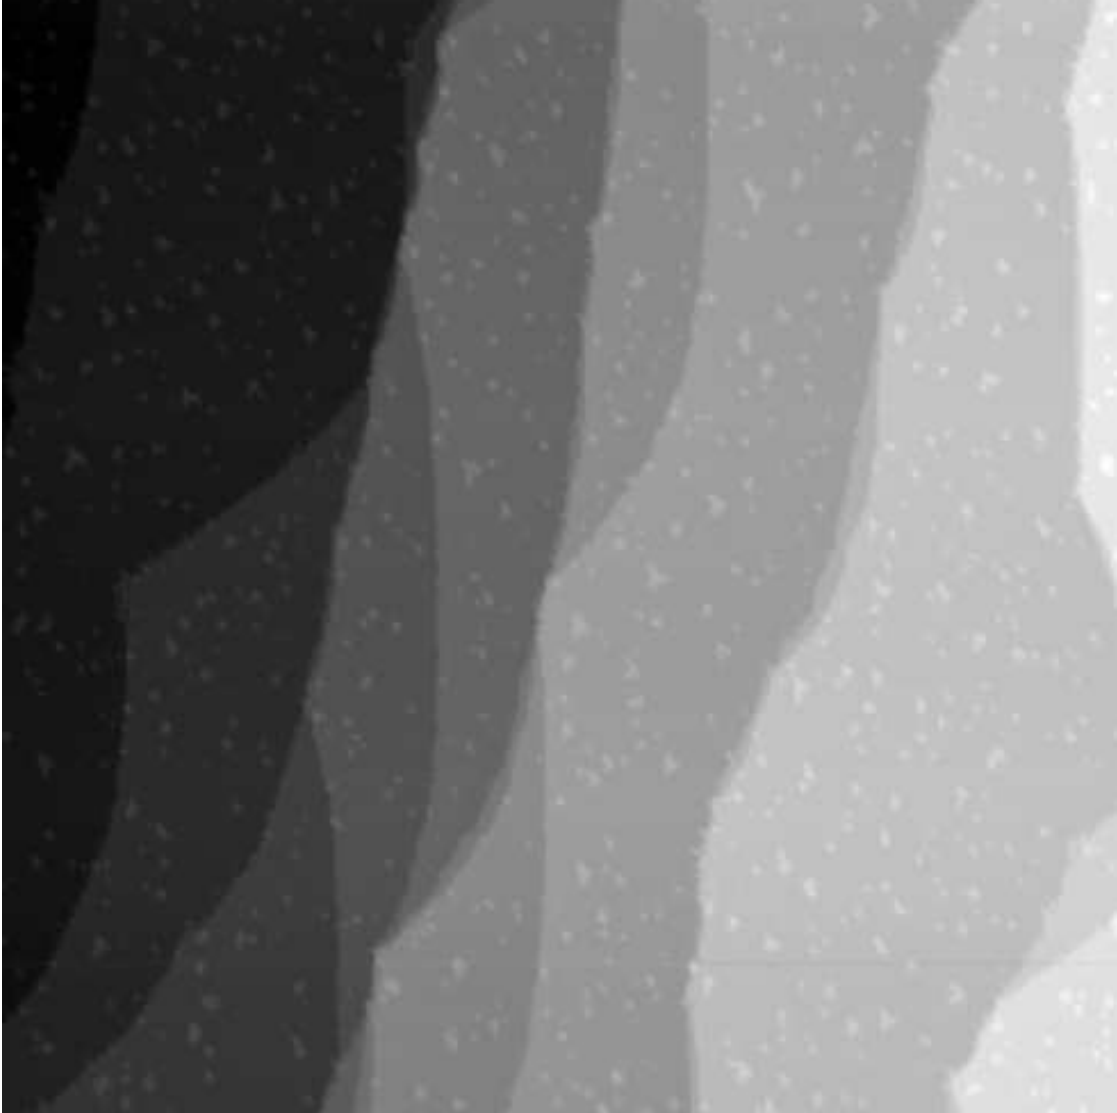

FIG. 32. Coordinates:  $x = 3,8$ ;  $y = 0,4$

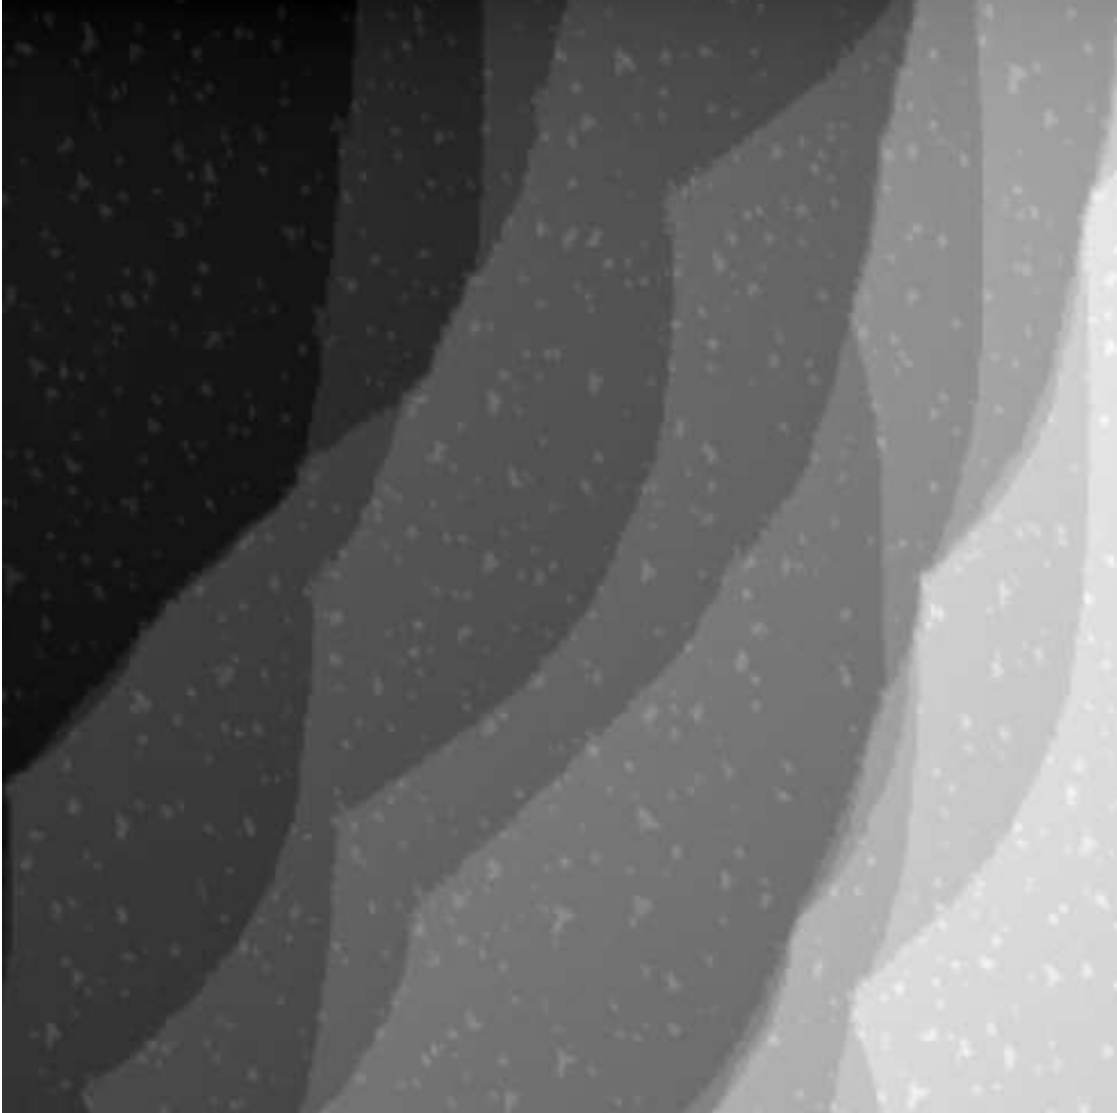

FIG. 33. Coordinates:  $x = 3,9$ ;  $y = 0,2$

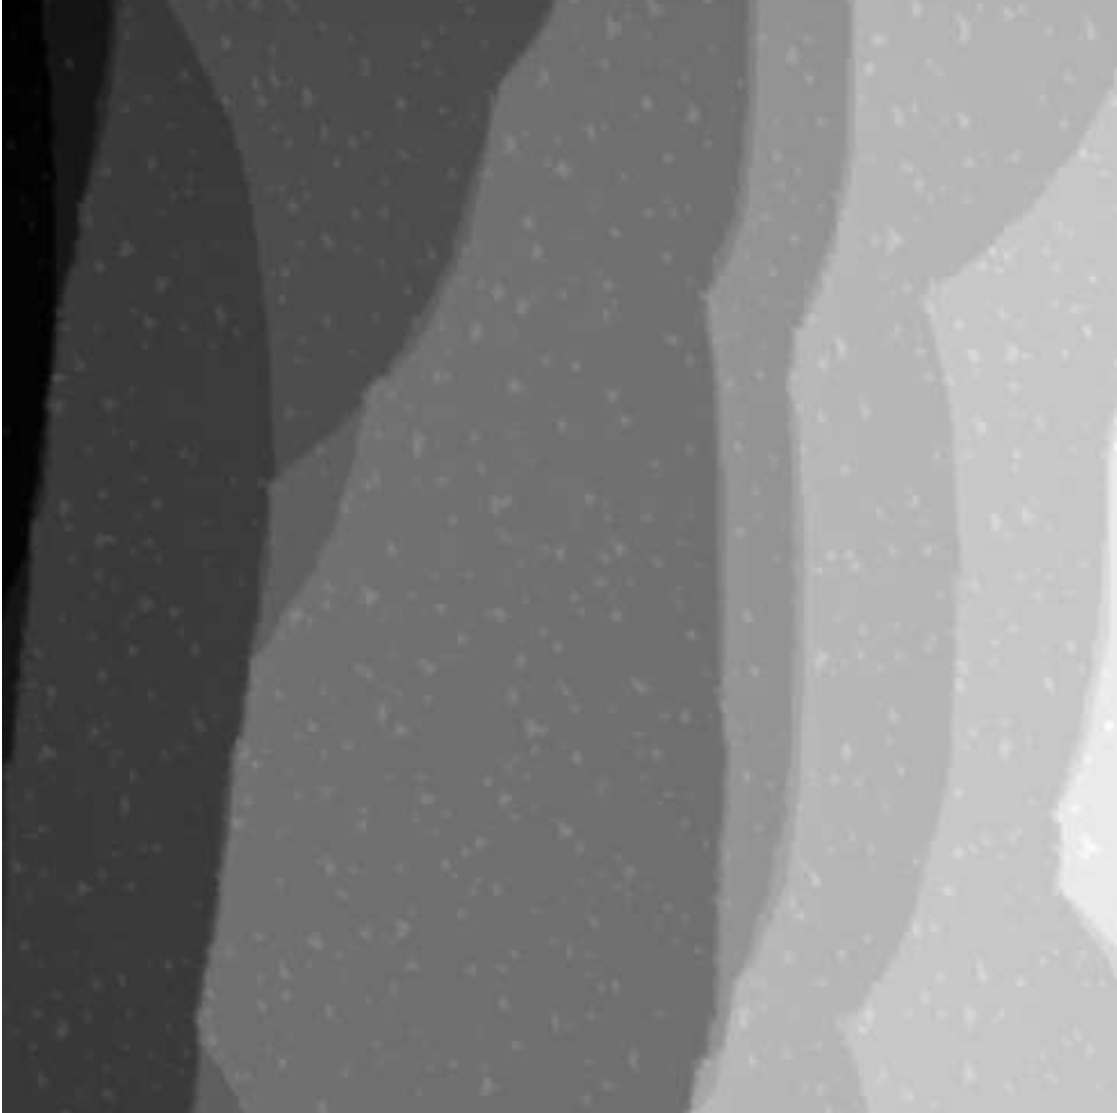

FIG. 34. Coordinates:  $x = 4,2$ ;  $y = 0,0$

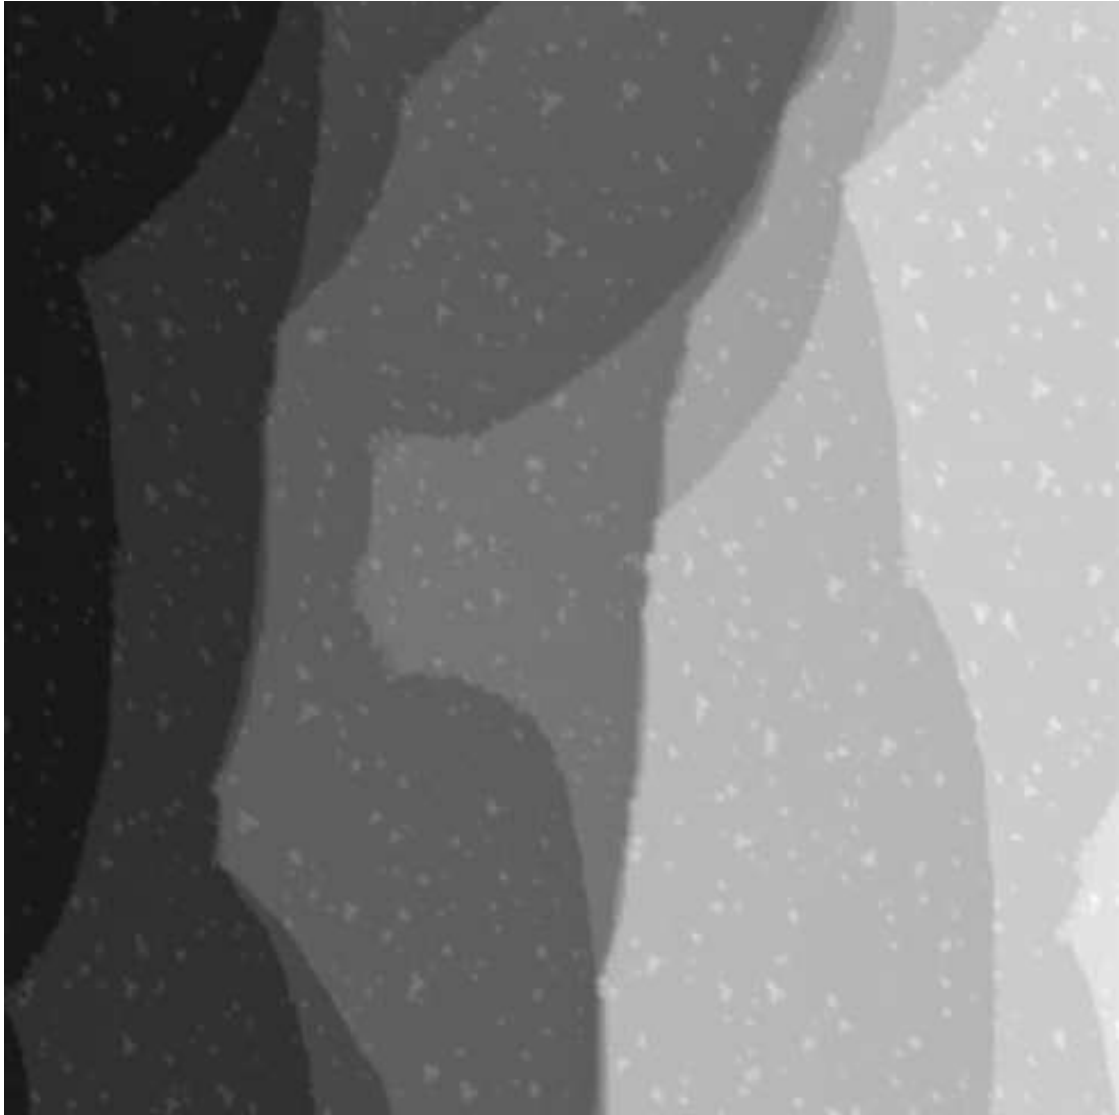

FIG. 35. Coordinates:  $x = 4,2$ ;  $y = 0,2$

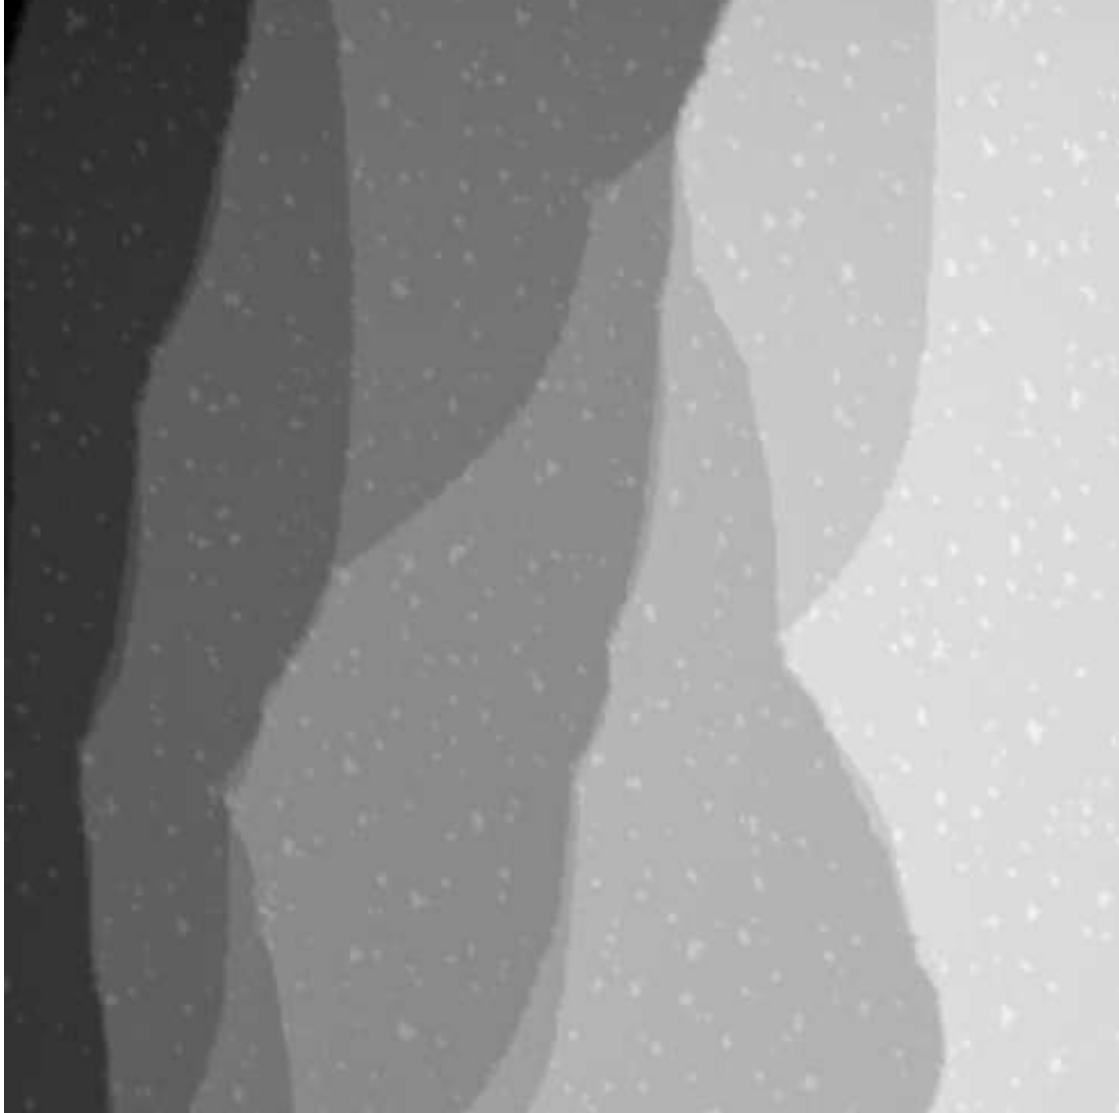

FIG. 36. Coordinates:  $x = 4,5$ ;  $y = 0,0$

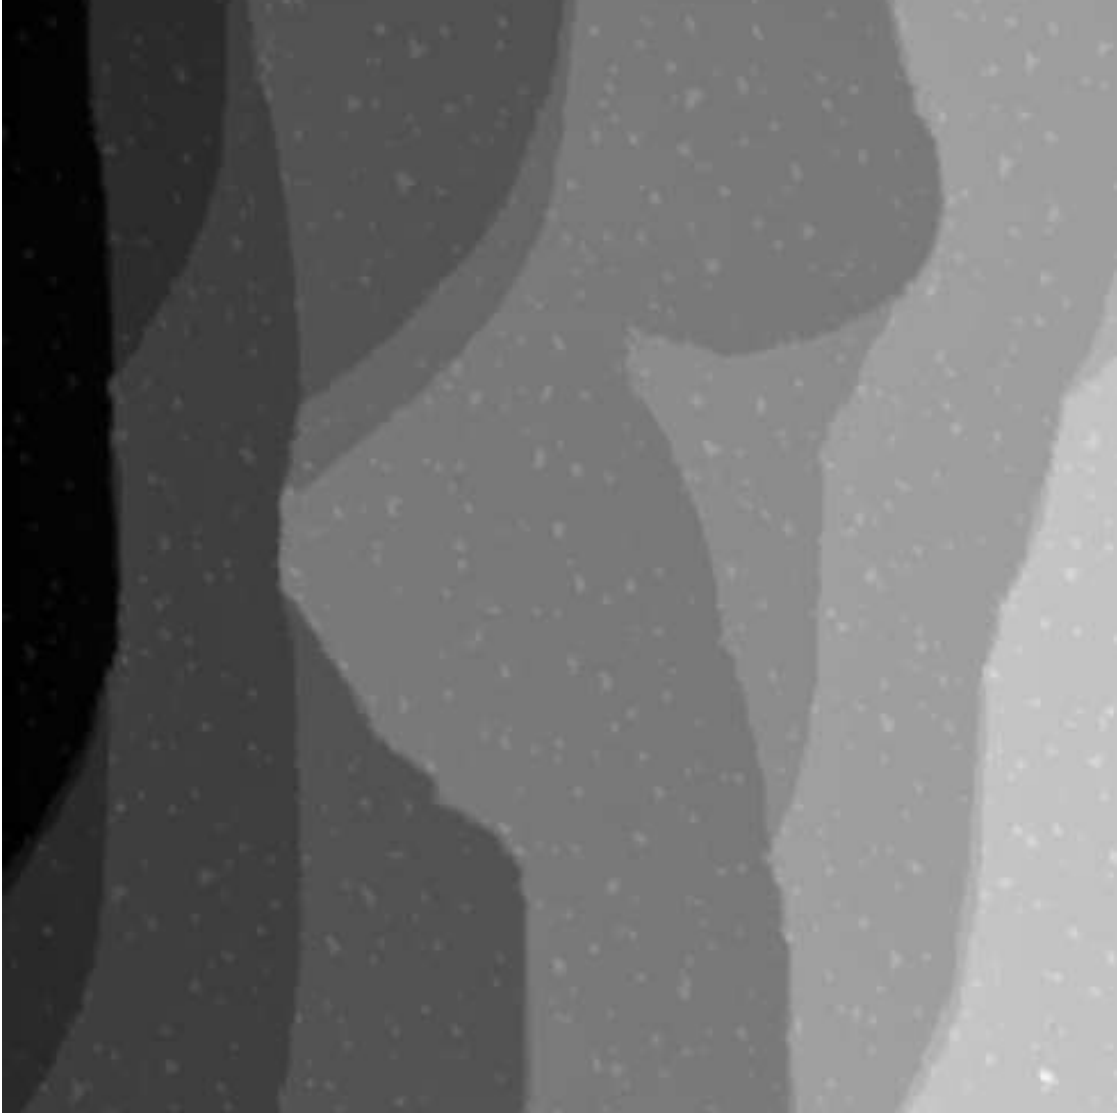

FIG. 37. Coordinates:  $x = 4,7$ ;  $y = 0,0$

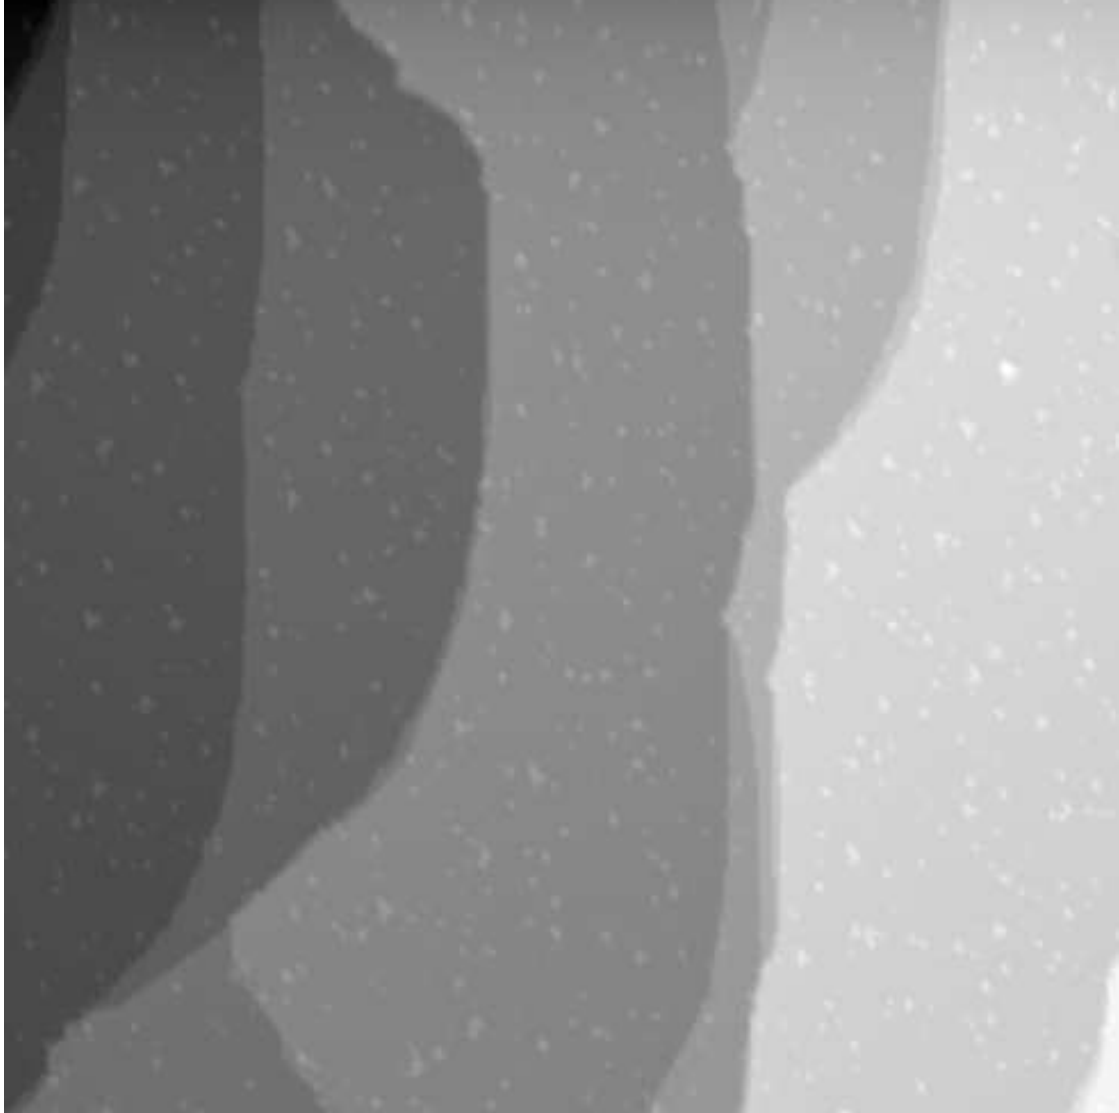

FIG. 38. Coordinates:  $x = 4,9$ ;  $y = 0,0$

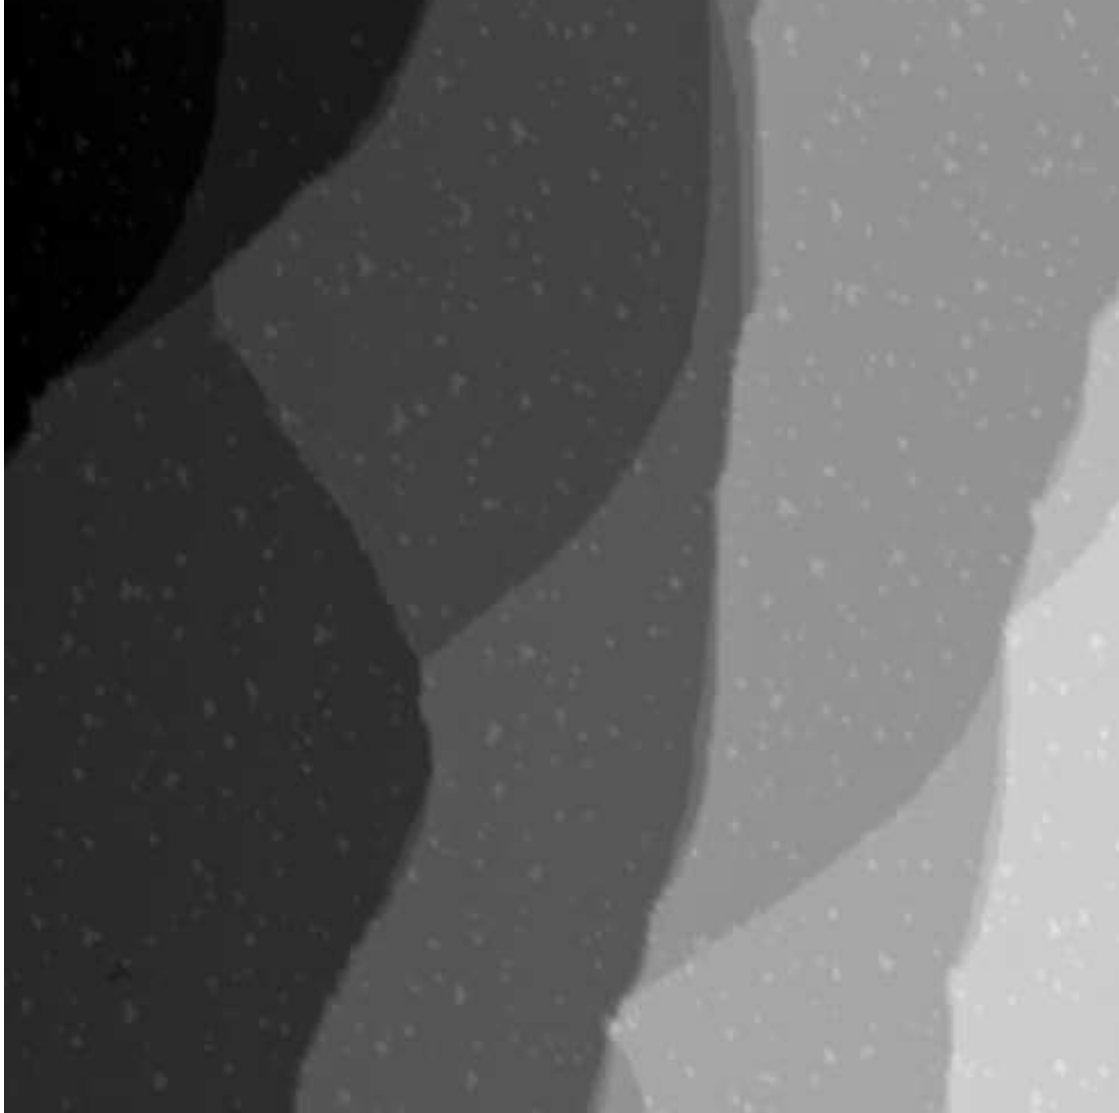

FIG. 39. Coordinates:  $x = 5,1$ ;  $y = 0,0$



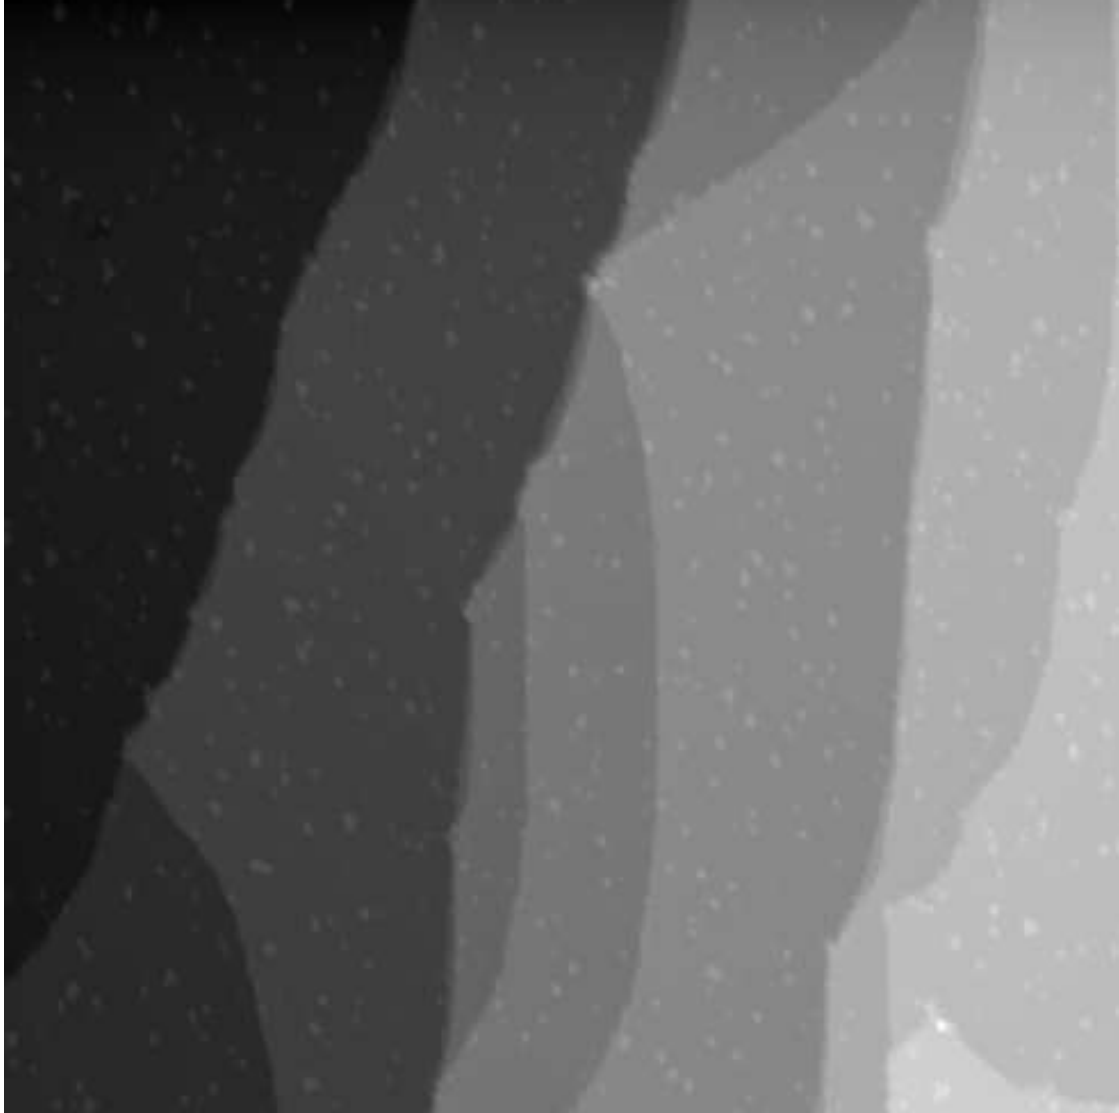

FIG. 40. Coordinates:  $x = 5,3$ ;  $y = 0,0$

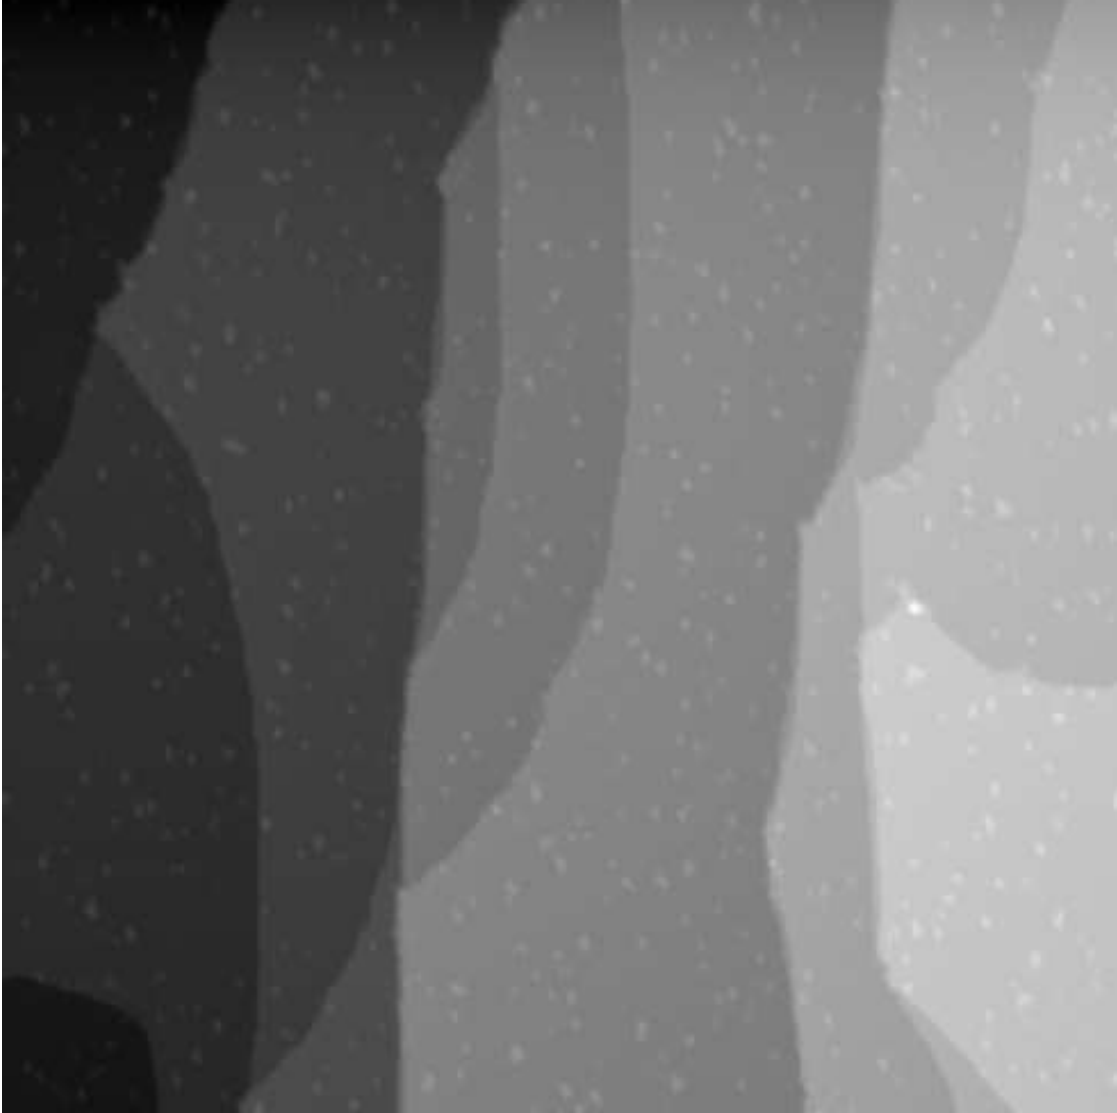

FIG. 41. Coordinates:  $x = 5,4$ ;  $y = 0,0$

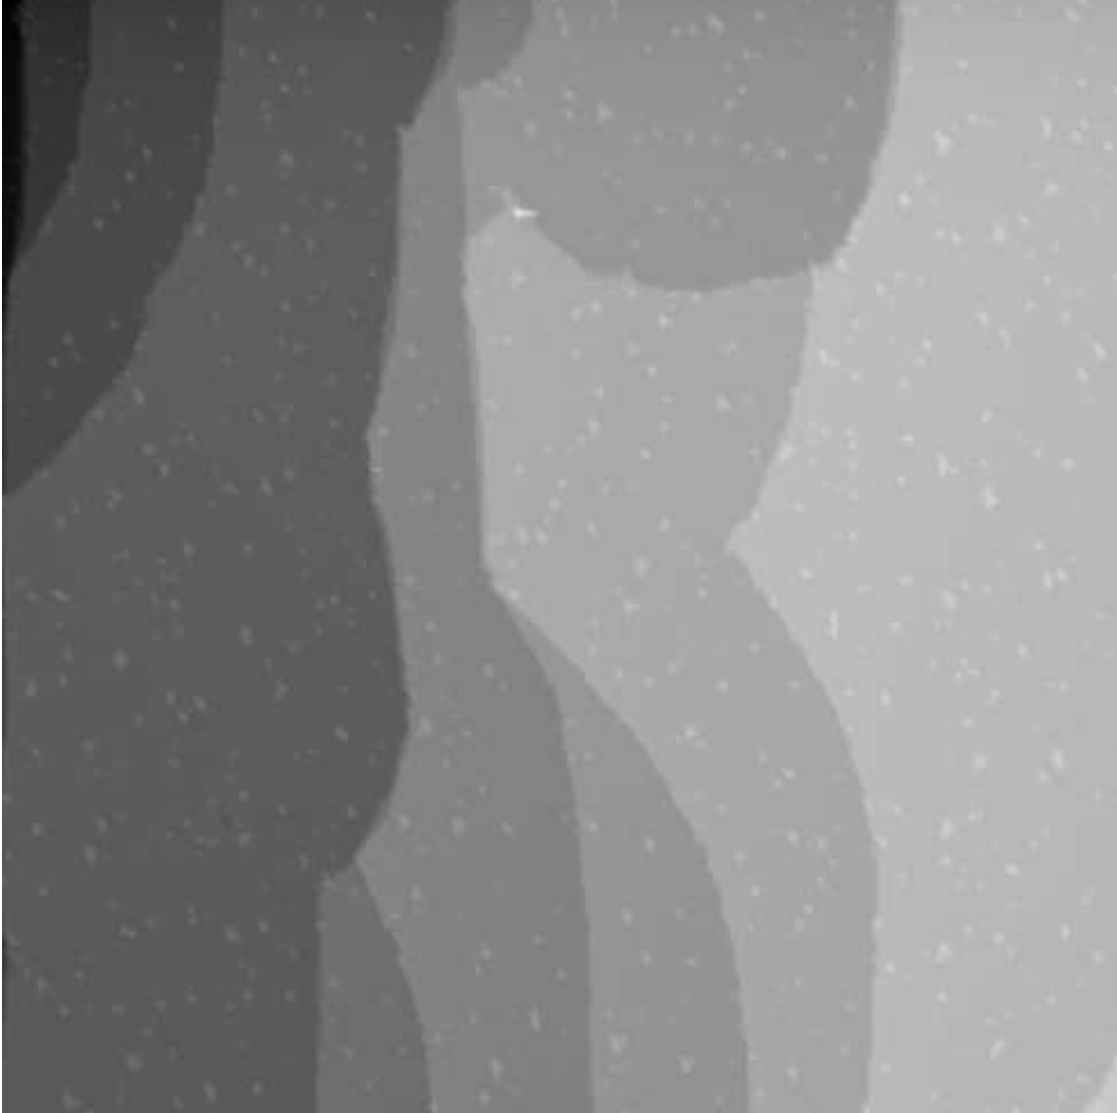

FIG. 42. Coordinates:  $x = 5,5$ ;  $y = 0,0$

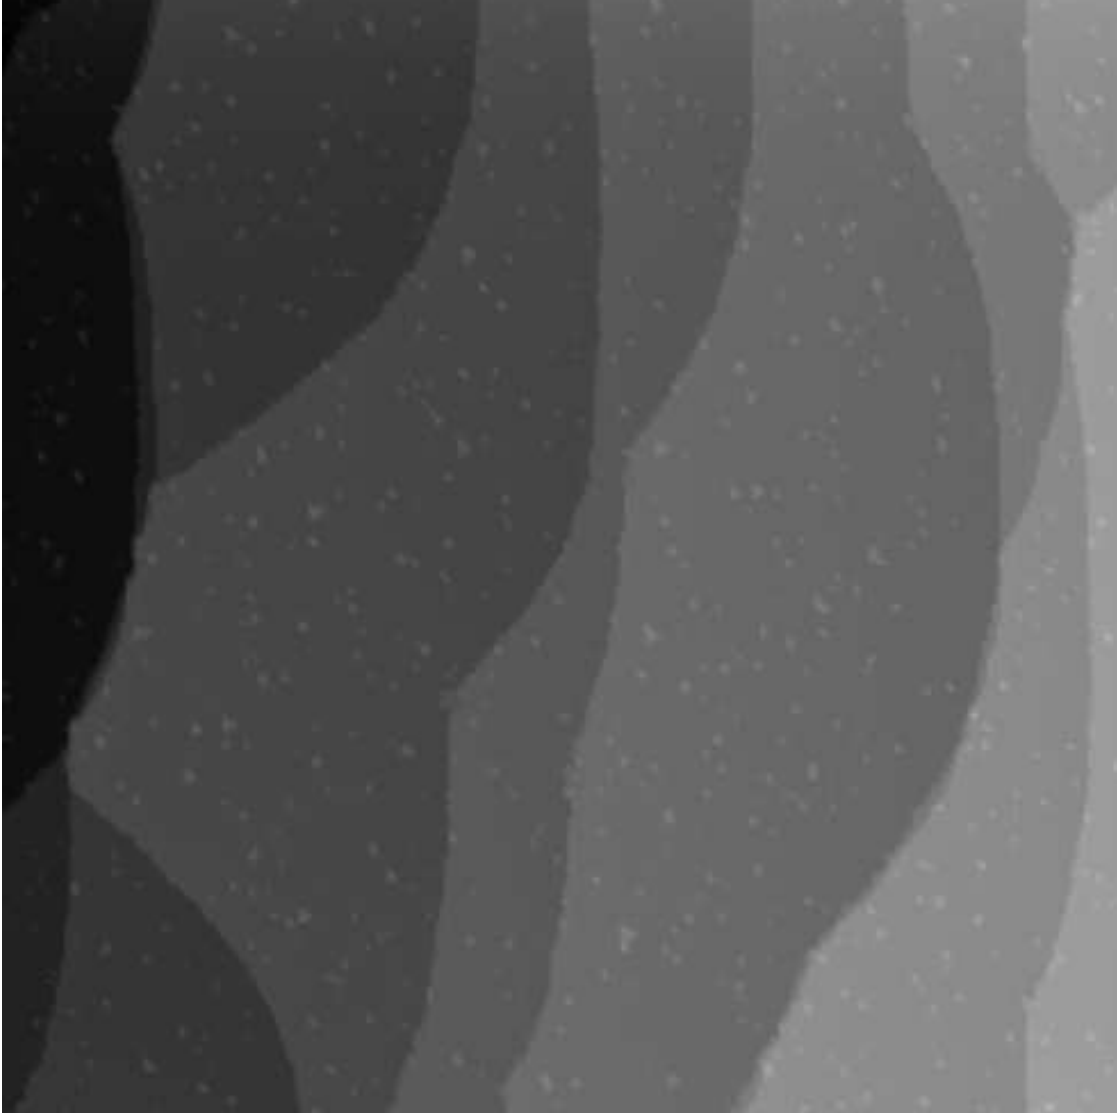

FIG. 43. Coordinates:  $x = 5,8$ ;  $y = 0,0$

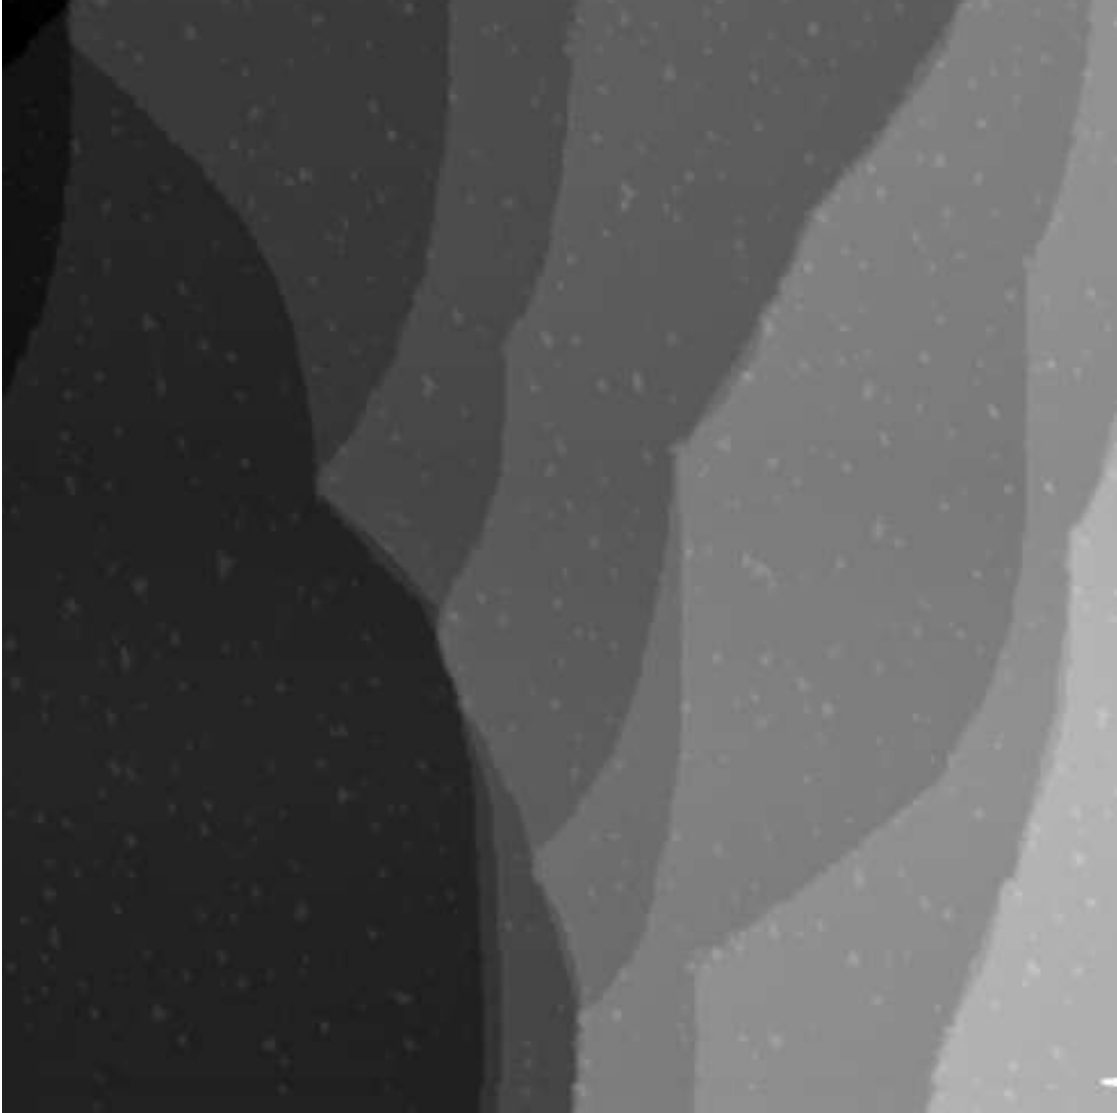

FIG. 44. Coordinates:  $x = 6,0$ ;  $y = 0,1$

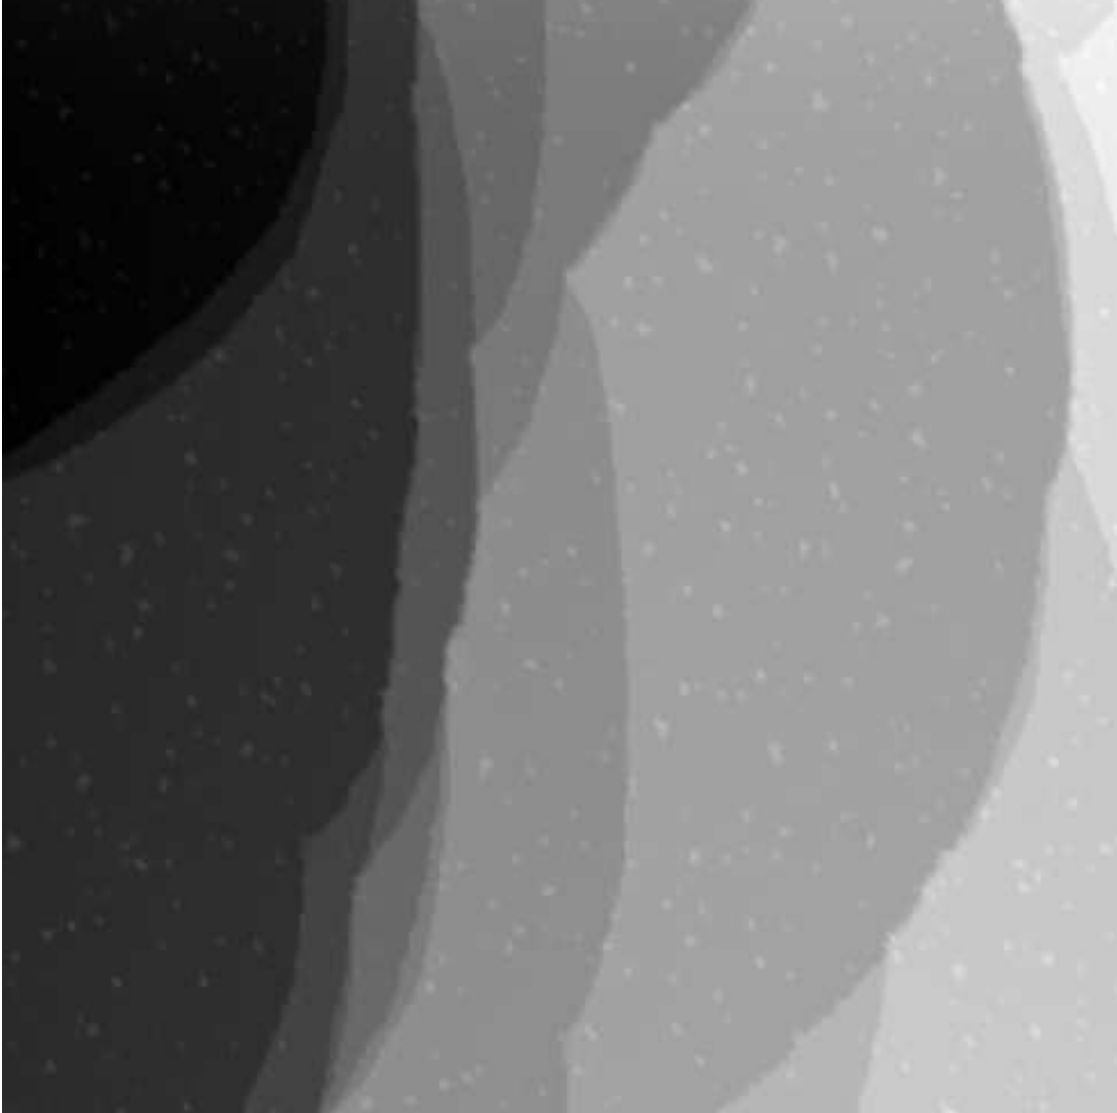

FIG. 45. Coordinates:  $x = 6,3$ ;  $y = 0,1$

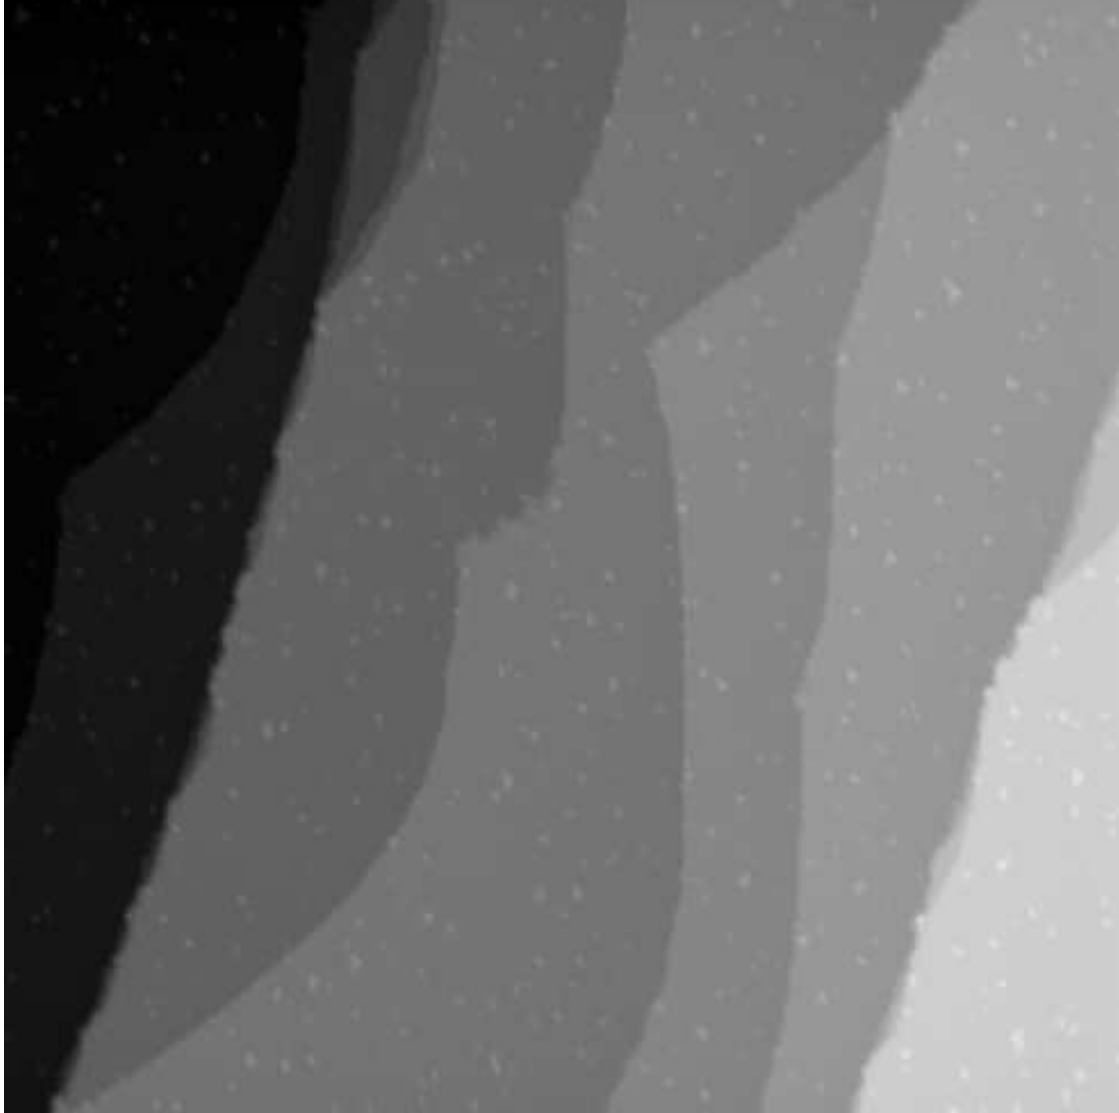

FIG. 46. Coordinates:  $x = 6,6$ ;  $y = 0,1$

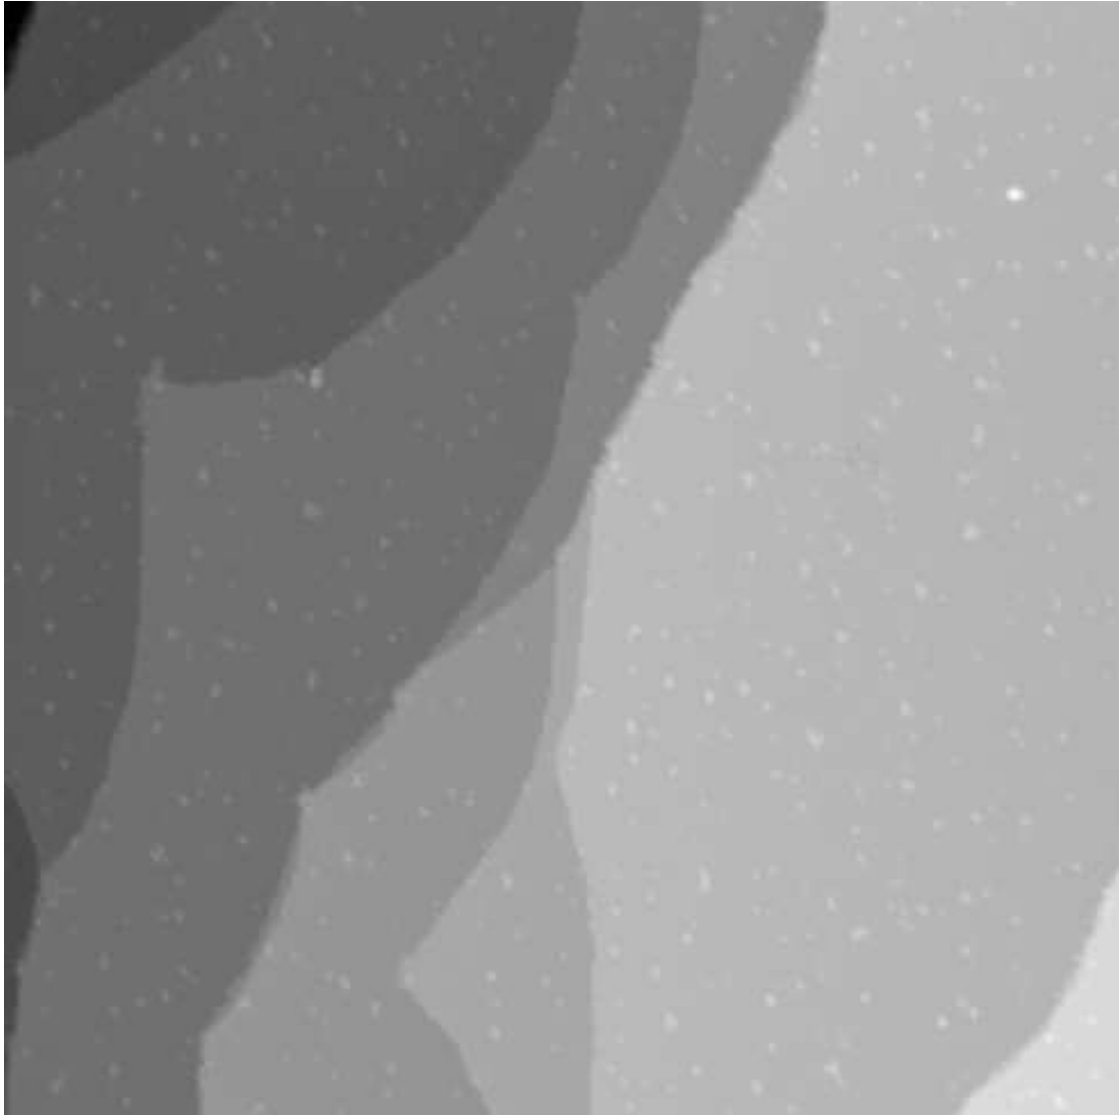

FIG. 47. Coordinates:  $x = 6,8$ ;  $y = 0,2$



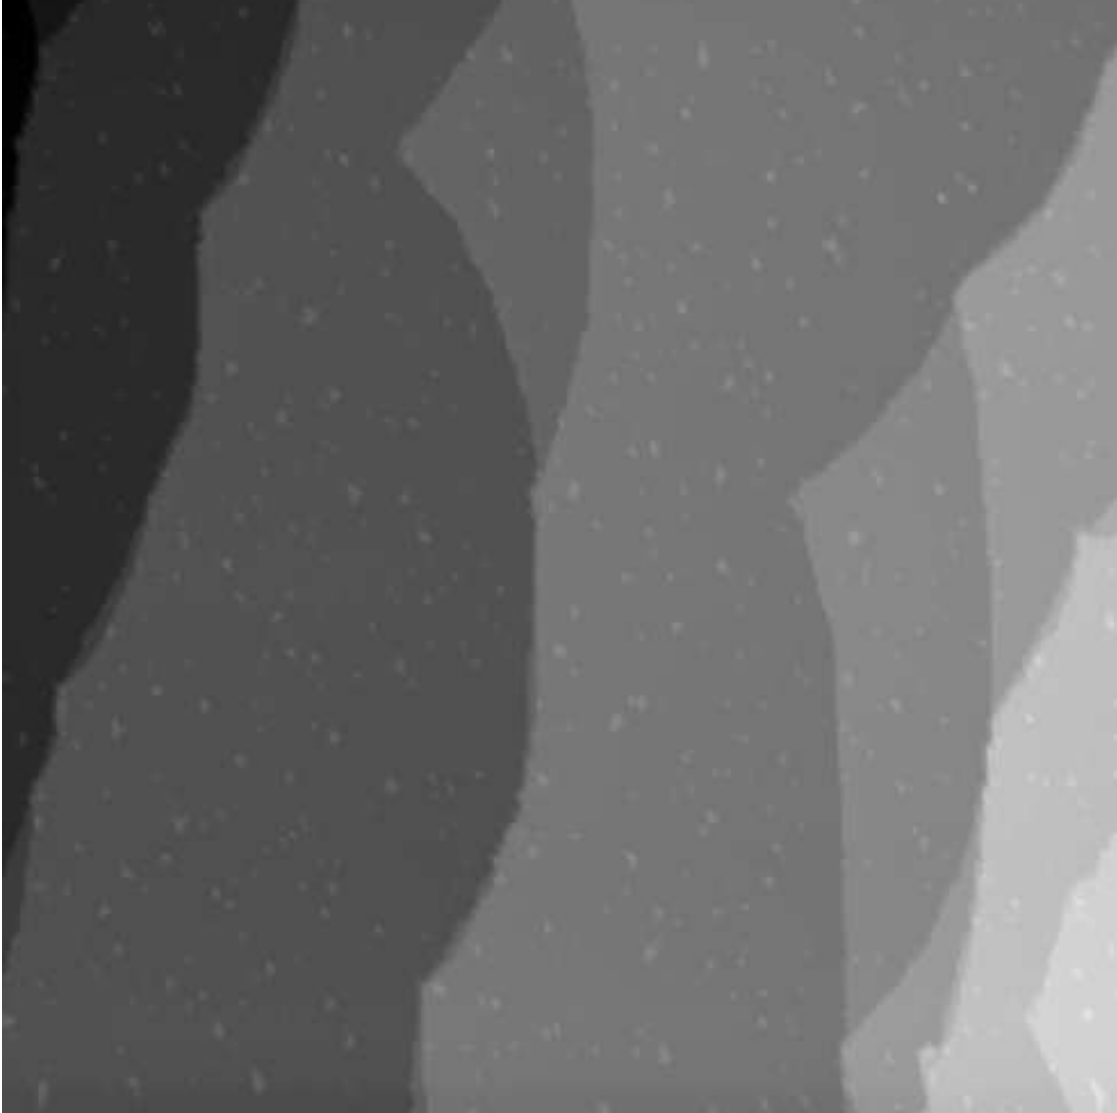

FIG. 48. Coordinates:  $x = 7,0$ ;  $y = 0,2$

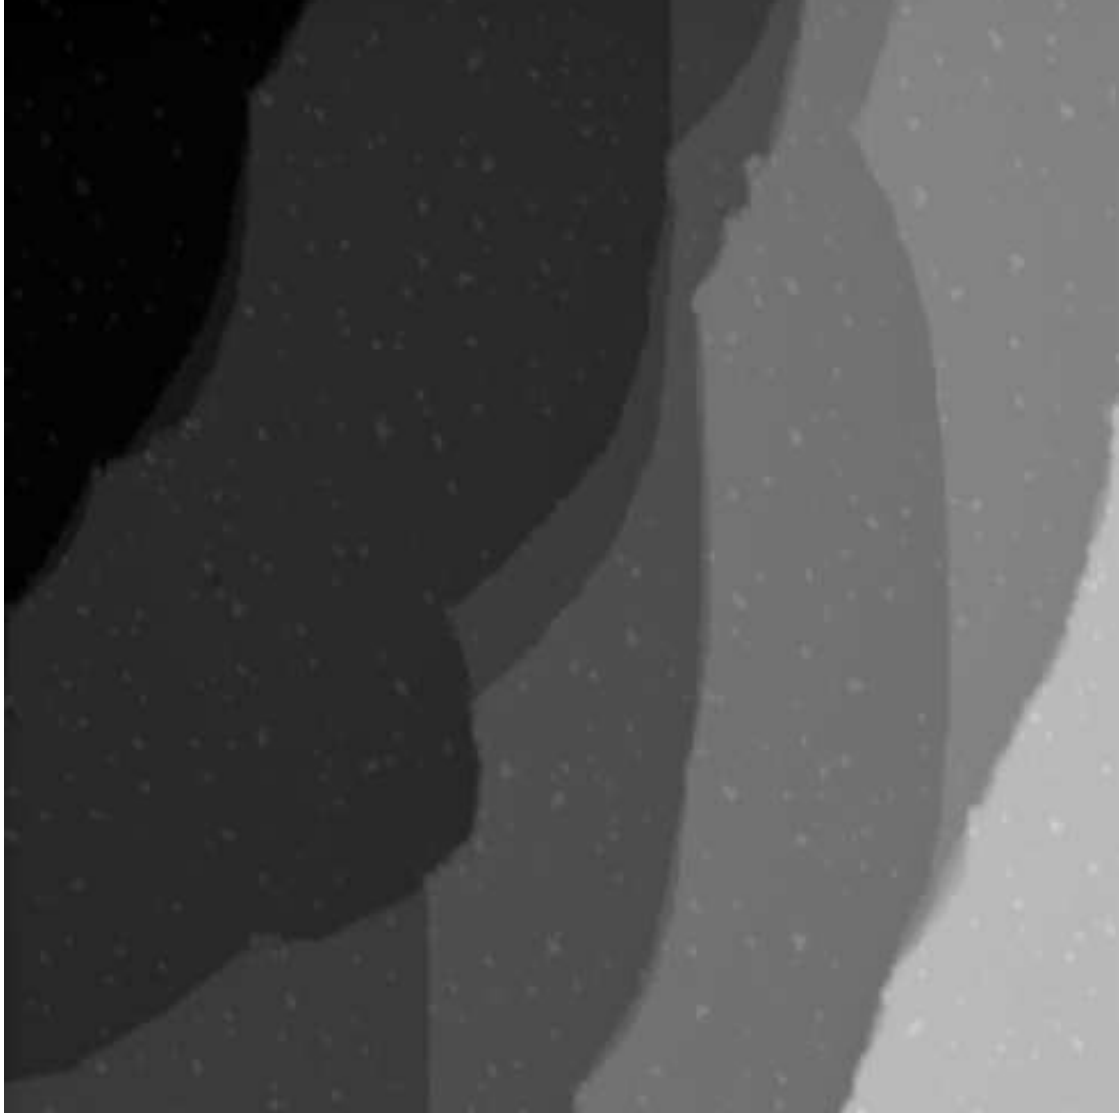

FIG. 49. Coordinates:  $x = 7,3$ ;  $y = 0,2$

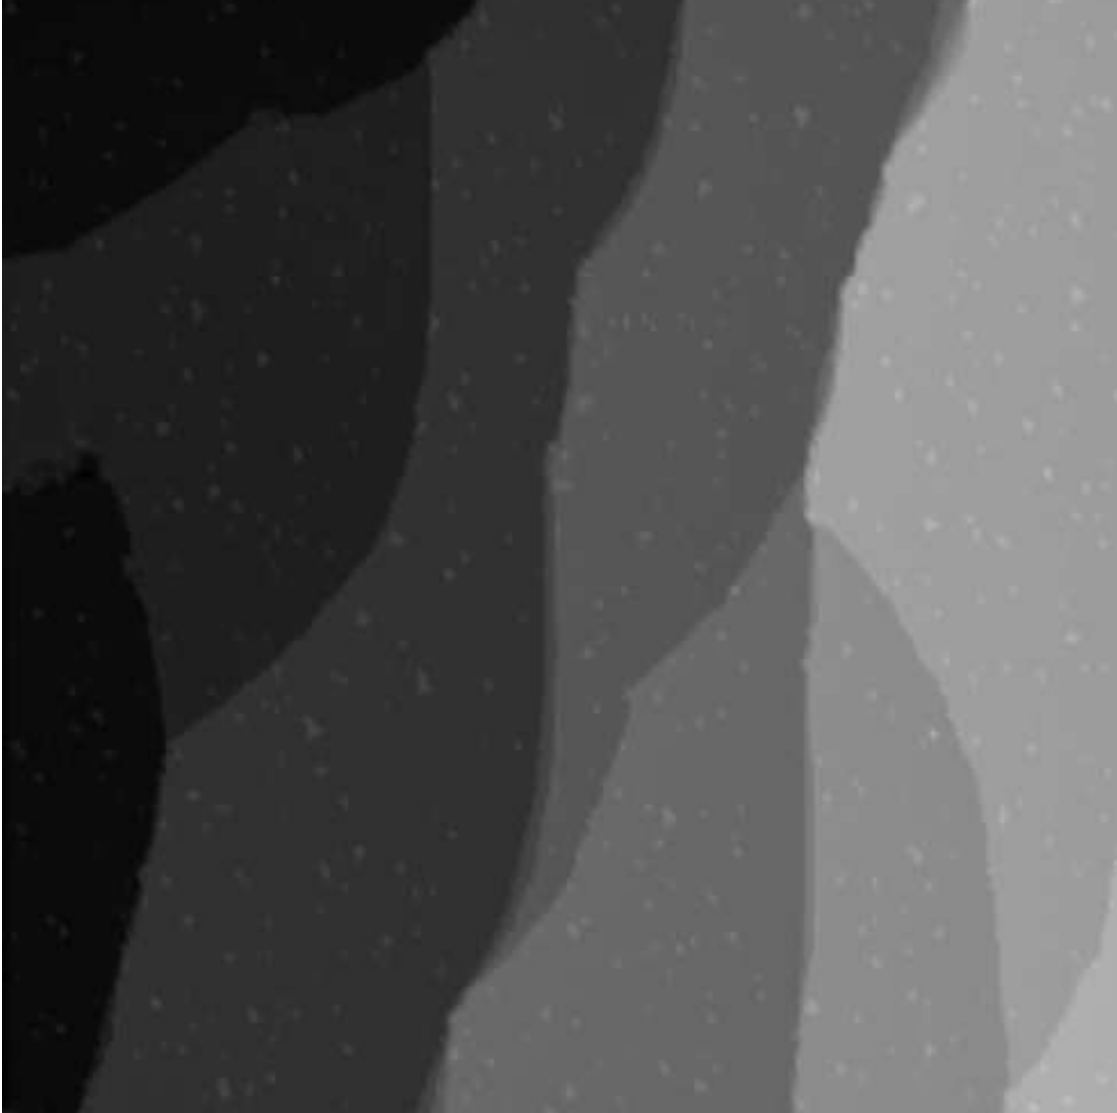

FIG. 50. Coordinates:  $x = 7,5$ ;  $y = 0,2$

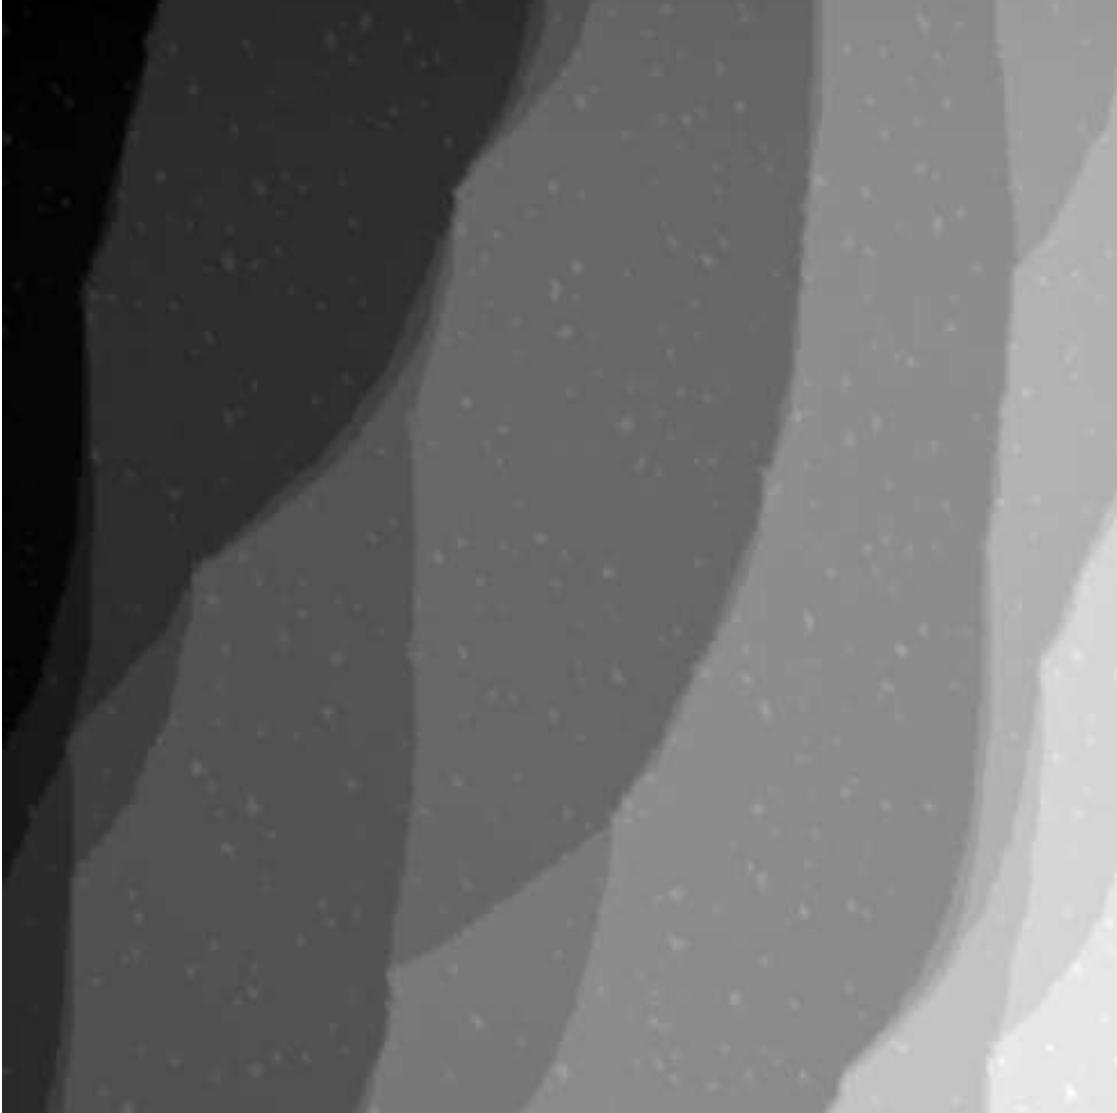

FIG. 51. Coordinates:  $x = 7,7$ ;  $y = 0,2$

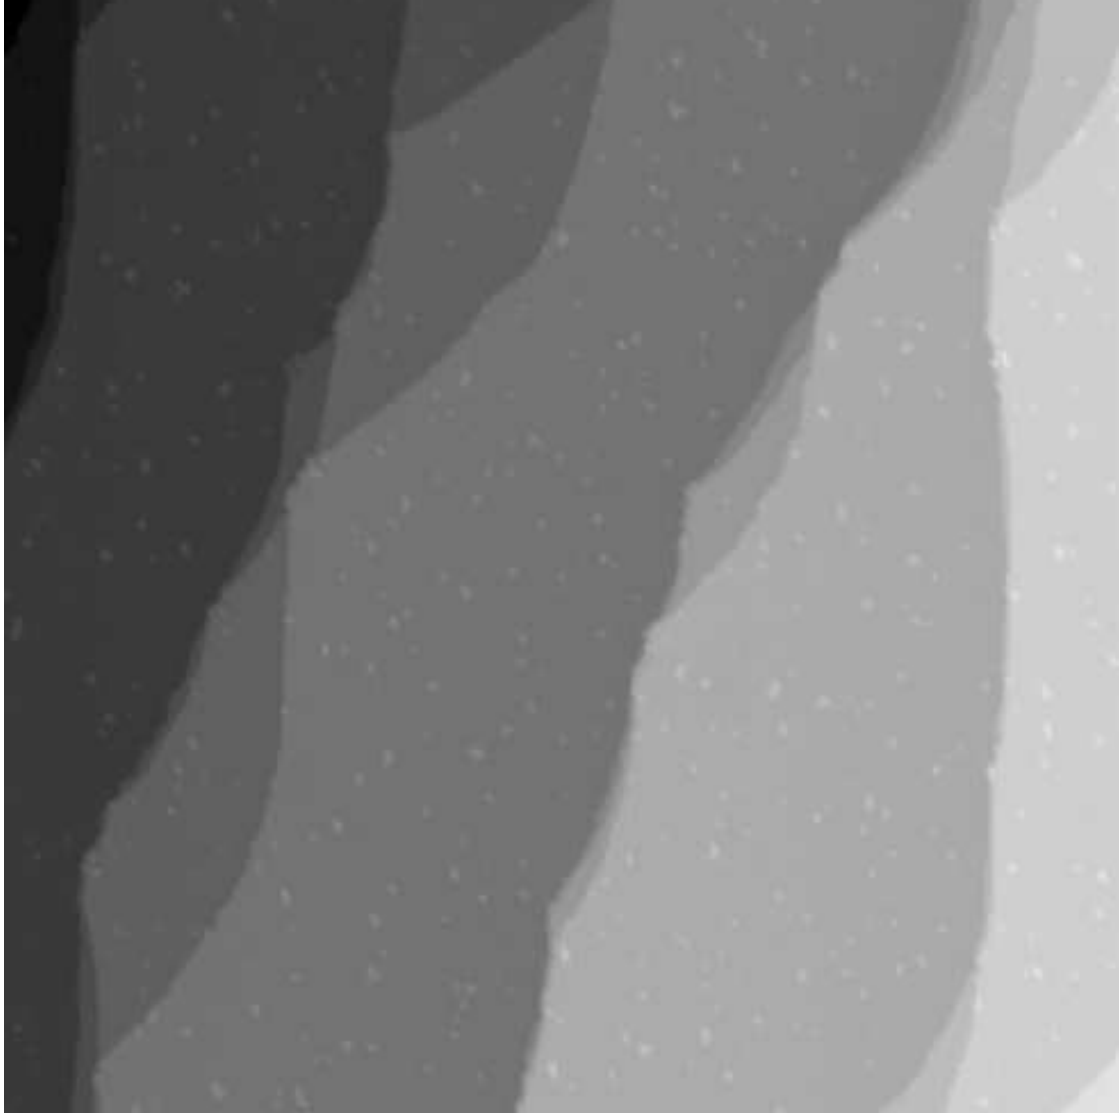

FIG. 52. Coordinates:  $x = 8,0$ ;  $y = 0,2$

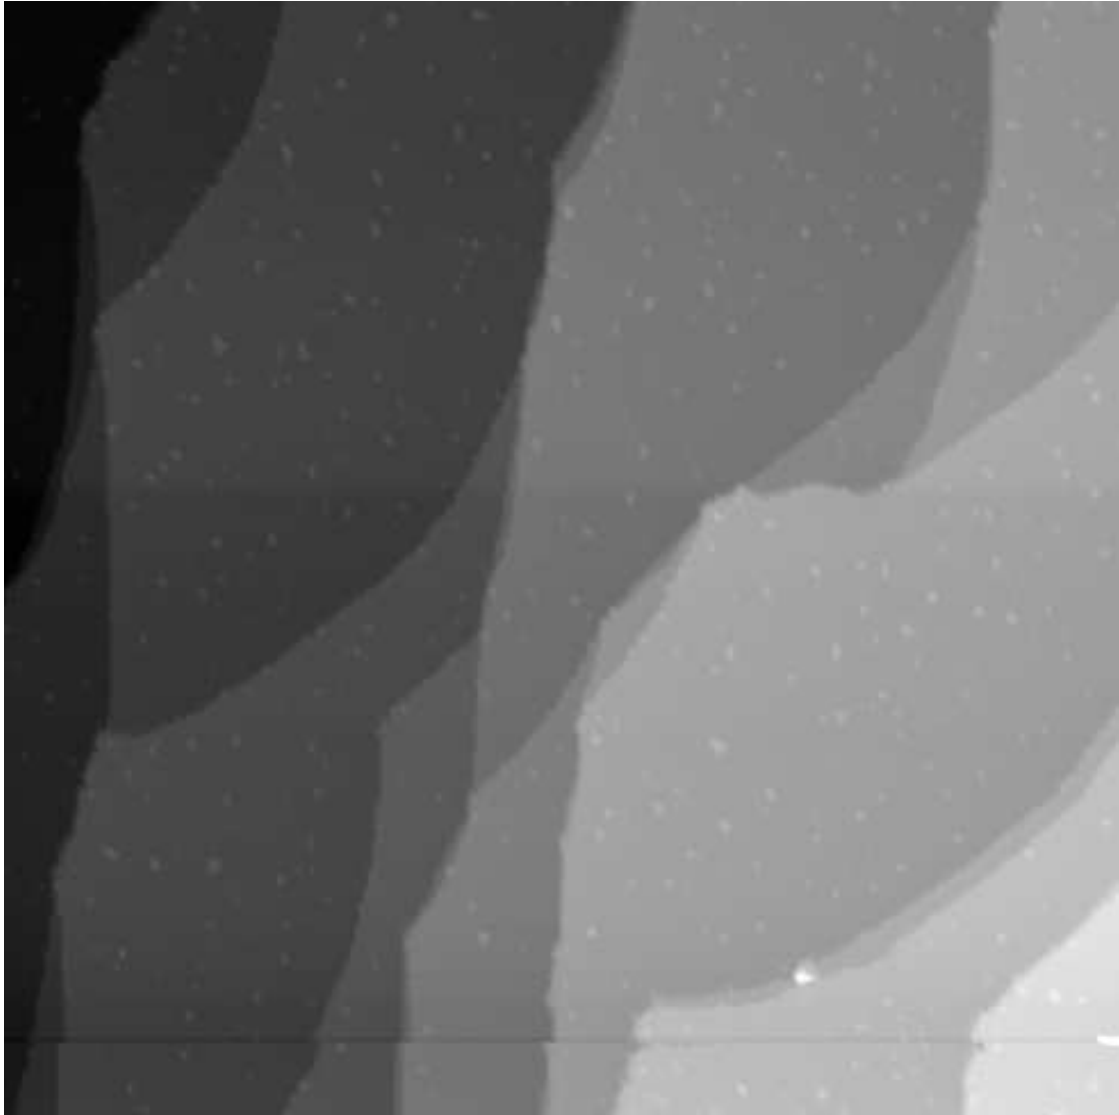

FIG. 53. Coordinates:  $x = 8,2$ ;  $y = 0,2$

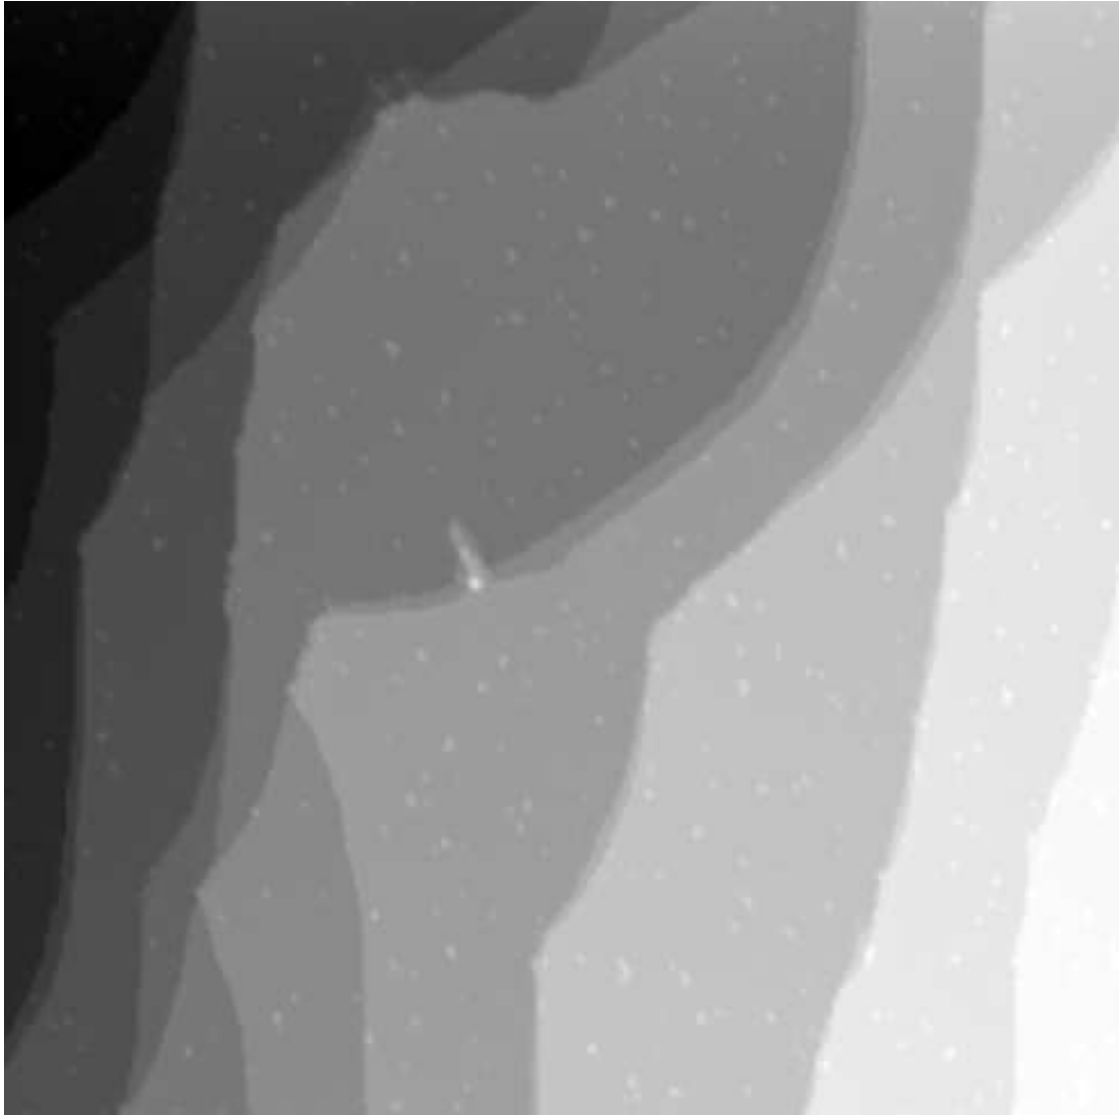

FIG. 54. Coordinates:  $x = 8,3$ ;  $y = 0,1$
